# Supplementary material
Source: PubMed Central journal article supplement (PMC3061030)
Supplement: emboj201123s1.pdf [file emboj201123s1.pdf]

## **Supplementary Information**

# **RNA content in the nucleolus alters p53 acetylation *via* MYBBP1A**

**Takao Kuroda, Akiko Murayama, Naohiro Katagiri, Yu-mi Ohta, Etsuko Fujita,  
Hiroshi Masumoto, Masatsugu Ema, Satoru Takahashi, Keiji Kimura, and Junn  
Yanagisawa**

Supplementary Methods

Supplementary Figure S1

Supplementary Figure S2

Supplementary Figure S3

Supplementary Figure S4

Supplementary Figure S5

Supplementary Figure S6

Supplementary Figure S7

Supplementary Figure S8

Supplementary Figure S9

Supplementary Figure S10

Supplementary Figure S11

Supplementary Figure S12

Supplementary Table S1

## Supplementary Methods

### *siRNAs*

All siRNAs were purchased from Invitrogen. The siRNA duplexes siMYBBP (5'-UUCACCAGCCGACCUGACUGAAAGA-3'), siMYBBP-2 (5'-GGUCCGAGAUGAAAUAUGCCCUGAA-3'), siTIF-IA (5'-CGACACCGUGGUUUCUCAUGCCAAU-3'), siRPL5 (5'-CCUACUUUAAGAGAUACCAAGUGAA-3'), siRPL11 (5'-GCUAGAUACACUGUCAGAUCUUUG-3'), siRPL23 (5'-CAGCAGUGGUCAUUCGACAACGAAA-3'), siRPL26 (5'-AAUCCCUUUGUGACUUCGACCGAA-3'). Stealth™ RNAi Luciferase reporter control duplex was used as a control.

### *RT-qPCR primers*

5'-ATCGTCCACCGCAAATGCTTCTA-3' and  
5'-AGCCATGCCAATCTCATCTTGTT-3' for  $\beta$ -Actin,  
5'-CCATGAAAAAGGACATAGTG-3' and 5'-CGTGTCAAAGGAGCTTGGT-3' for  
TIF-IA, 5'-CCTGCAAACATGAGAAGCTG-3' and  
5'-AGTGTGCCCCCTGCCTGTAG-3' for MYBBP1A,  
5'-TGTTGCAGATTACATGCGCTACT-3' and  
5'-CTCTCGTATAGCAGCATGAGCTT-3' for RPL5,  
5'-CAGGTTTCAGCATCGCAGACAAG-3' and  
5'-TTTGCCAGGAAGGATGATCCCA-3' for RPL11,  
5'-AGTGGTCATTCGACAACGAAAG-3' and

5'-CTACTGGTCCTGTAATGGCAGAA-3' for RPL23,  
5'-CGGGAAAAGGCTAATGGCACAAC-3' and  
5'-CGAGATTTGGCTTTCCGTTTCGAG-3' for RPL26,  
5'-GGAGACTCTCAGGGTCGAAA-3' and 5'-TTAGGGCTTCCTCTTGGAGA-3' for  
p21, 5'-CTCTCAGATGAAGATGATGAGG-3' and  
5'-CTGTTGCAATGTGATGGAAGG-3' for HDM2,  
5'-GGGCCCAGACTGTGAATCCT-3' and  
5'-ACGTGCTCTCTCTAAACCTATGCA-3' for PUMA, 5'-  
AGTCGGGTTGCTTGGGAATGC -3' and 5'- CCCTTACGGTACTTGTTGACT -3'  
for 28S rRNA.

### ***Antibodies***

Rabbit anti-human MYBBP1A antibody was raised against a synthetic peptide corresponding to 1265–1328 amino acids of human MYBBP1A. Anti-Myc (MC045) antibody was purchased from Nacalai tesque; anti-FLAG M2 antibody, anti-FLAG M2-agarose and anti-β-Actin antibody were from Sigma; anti-HA (3F10) and anti-BrdU antibodies were purchased from Roche diagnostics; anti-p53 (DO-1 and FL393), anti-HDM2 (SMP-14), anti-UBF (F-9) and anti-p300 (N-15) antibodies were from Santa Cruz Biotechnology; anti-p53-K382Ac, anti-p53-S15P and anti-PUMA antibodies were from Cell Signaling Technology; anti-p53-K305Ac antibody was from BioLegend; anti-p53-K373Ac antibody was from Epitomics; anti-NPM antibody was from Zymed Laboratories.

### ***RNA purification and RT-qPCR***

Total RNA was isolated from cultured cells with Sepasol RNA I Super reagent (Nacal Tesque) and subjected to reverse transcription using random hexamers and SuperScript III reverse transcriptase (Invitrogen) according to the manufacturer's protocol. RT-qPCR was performed with the Thermal Cycler Dice Real Time System (TaKaRa). Data analysis was performed by using the comparative Ct method. Results were normalized to  $\beta$ -actin.

### ***Immunofluorescence***

Cells grown on chamber slides were rinsed twice with phosphate-buffered saline (PBS) (140 mM NaCl, 2.7 mM KCl, 1.5 mM  $\text{KH}_2\text{PO}_4$ , and 8.1 mM  $\text{Na}_2\text{HPO}_4$ ) and fixed in 3.7% formaldehyde in PBS for 10 min. After rinsing twice with PBS, the cells were permeabilized in 0.1% Triton X-100 in PBS, blocked with TBS-T buffer containing 0.5% bovine serum albumin and 10% goat serum for 1 hour at room temperature. Then the cells were incubated with anti-MYBBP1A, anti-UBF, or anti-NPM antibodies for 1 hour, stained with AlexaFluor-conjugated secondary antibodies (Invitrogen) for 1 hour and mounted with Vectashield (Vector Laboratories). Immunofluorescence was performed using Biozero immunofluorescence microscopy (Keyence, Osaka, Japan).

### ***Immunoblotting***

Cell extracts were separated by SDS-polyacrylamide gel electrophoresis and transferred to PVDF membranes. After blocking with 3% skim milk in TBS-T buffer [20 mM Tris-HCl (pH 7.5), 150 mM NaCl, and 0.05% Tween20] for 1 hour, the membranes were incubated with the first antibody overnight at 4°C. After washing with TBS-T buffer, the membranes were incubated with horseradish peroxidase-conjugated

secondary antibody for 90 min. Bands were detected with Chemi-Lumi One (Nacalai tesque) or Immobilon Western blotting detection kit (Millipore). Stripping was performed using WB stripping solution (Nacalai tesque) according to the manufacturer's protocol. Total, phosphorylated, and acetylated forms of p53 were evaluated on the same membrane.

### ***GST pull-down assay***

cDNAs encoding full-length human p53 and its deletion mutant derivatives were cloned into pGEX-4T-1 (Amersham Biosciences). GST fusion proteins were expressed in BL-21 cells following induction with IPTG and purified with glutathione Sepharose 4B beads (Amersham). <sup>35</sup>S-labeled MYBBP1A was synthesized using in vitro transcription/translation-coupled reticulocyte lysate system (Promega). Binding was performed in TNE buffer [150 mM NaCl, 0.5% Nonidet P-40, 50 mM Tris-HCl (pH 8.0), 5 mM EDTA] for 30 min under rotation at 4°C, and the beads were washed 5 times with TNE buffer. Beads were boiled in SDS sample buffer for 5 min, and the supernatants were loaded to SDS-polyacrylamide gels followed by autoradiography.

### ***Nuclear run-on assay***

cDNAs probes corresponding to 28S rRNA was amplified by polymerase chain reaction, cloned into pGEM-T easy vector and spotted onto Hybond-N+ membrane (GE Healthcare). Run-on assay was performed on MCF-7 cells transfected with Control, MYBBP1A, RPL5, or RPL11 siRNA with or without TIF-IA siRNA. Approximately  $1.0 \times 10^7$  cells were collected on ice and suspended in lysis buffer [10 mM Tris-HCl (pH 7.4), 10 mM NaCl, 3 mM MgCl<sub>2</sub> and 0.5% NP-40] for 10 min. Nuclei were collected

by centrifugation at  $1,000 \times g$  for 5 min, and washed twice with the same buffer. The nuclei were suspended in 50 mM Tris-HCl (pH 8.3), 40% glycerol, 5 mM  $MgCl_2$  and 0.1 mM EDTA. The nuclei were mixed with an equal volume of reaction buffer [50 mM Tris-HCl (pH 8.0), 5 mM  $MgCl_2$ , 300 mM KCl, 0.5 mM of ATP, CTP, GTP and 100  $\mu$ Ci of  $\alpha$ - $^{32}P$  UTP] and incubated for 30 min at 30°C. Nuclear RNA was extracted and resuspended in RapidHyb hybridization buffer (GE Healthcare). Hybridization was carried out at 42°C for 24 hour. Membrane was washed twice at room temperature in 2 $\times$  SSC containing 0.1% SDS and twice at 65°C in 0.2 $\times$  SSC containing 0.1% SDS, and then exposed on BioMAX MS film.

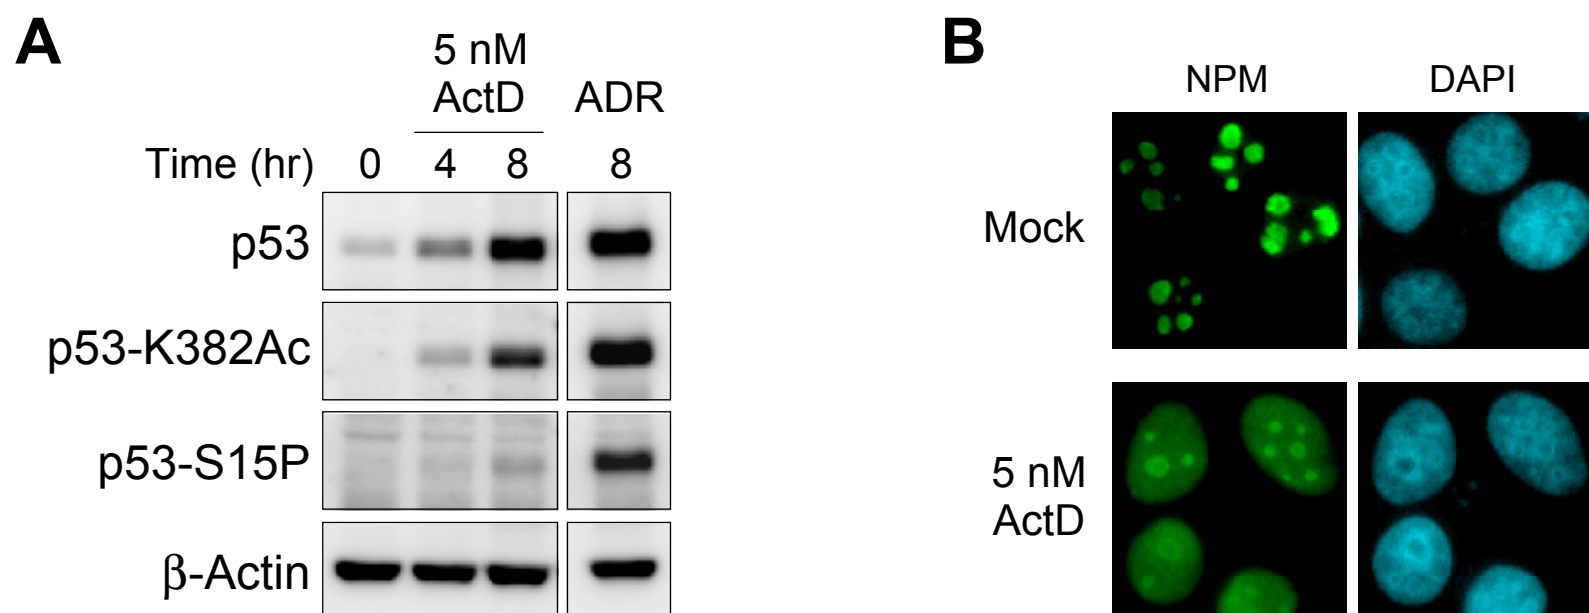

**Supplementary Figure S1** Nucleolar disruption induced by low dose of ActD treatment causes acetylation of p53 protein without phosphorylation. **(A)** Low dose of ActD treatment induced accumulation and acetylation but not phosphorylation of p53 protein. MCF-7 cells were treated with a low concentration (5 nM) of ActD for indicated times, and the cell lysates were analyzed by immunoblot using the indicated antibodies. Lysates prepared from ADR (0.5  $\mu$ g/ml)-treated cells were used as a positive control. **(B)** Nucleolar structure was disrupted by low dose of ActD treatment. MCF-7 cells were treated with 5 nM ActD for 8 hours, and the localization of NPM was visualized by immunofluorescence.

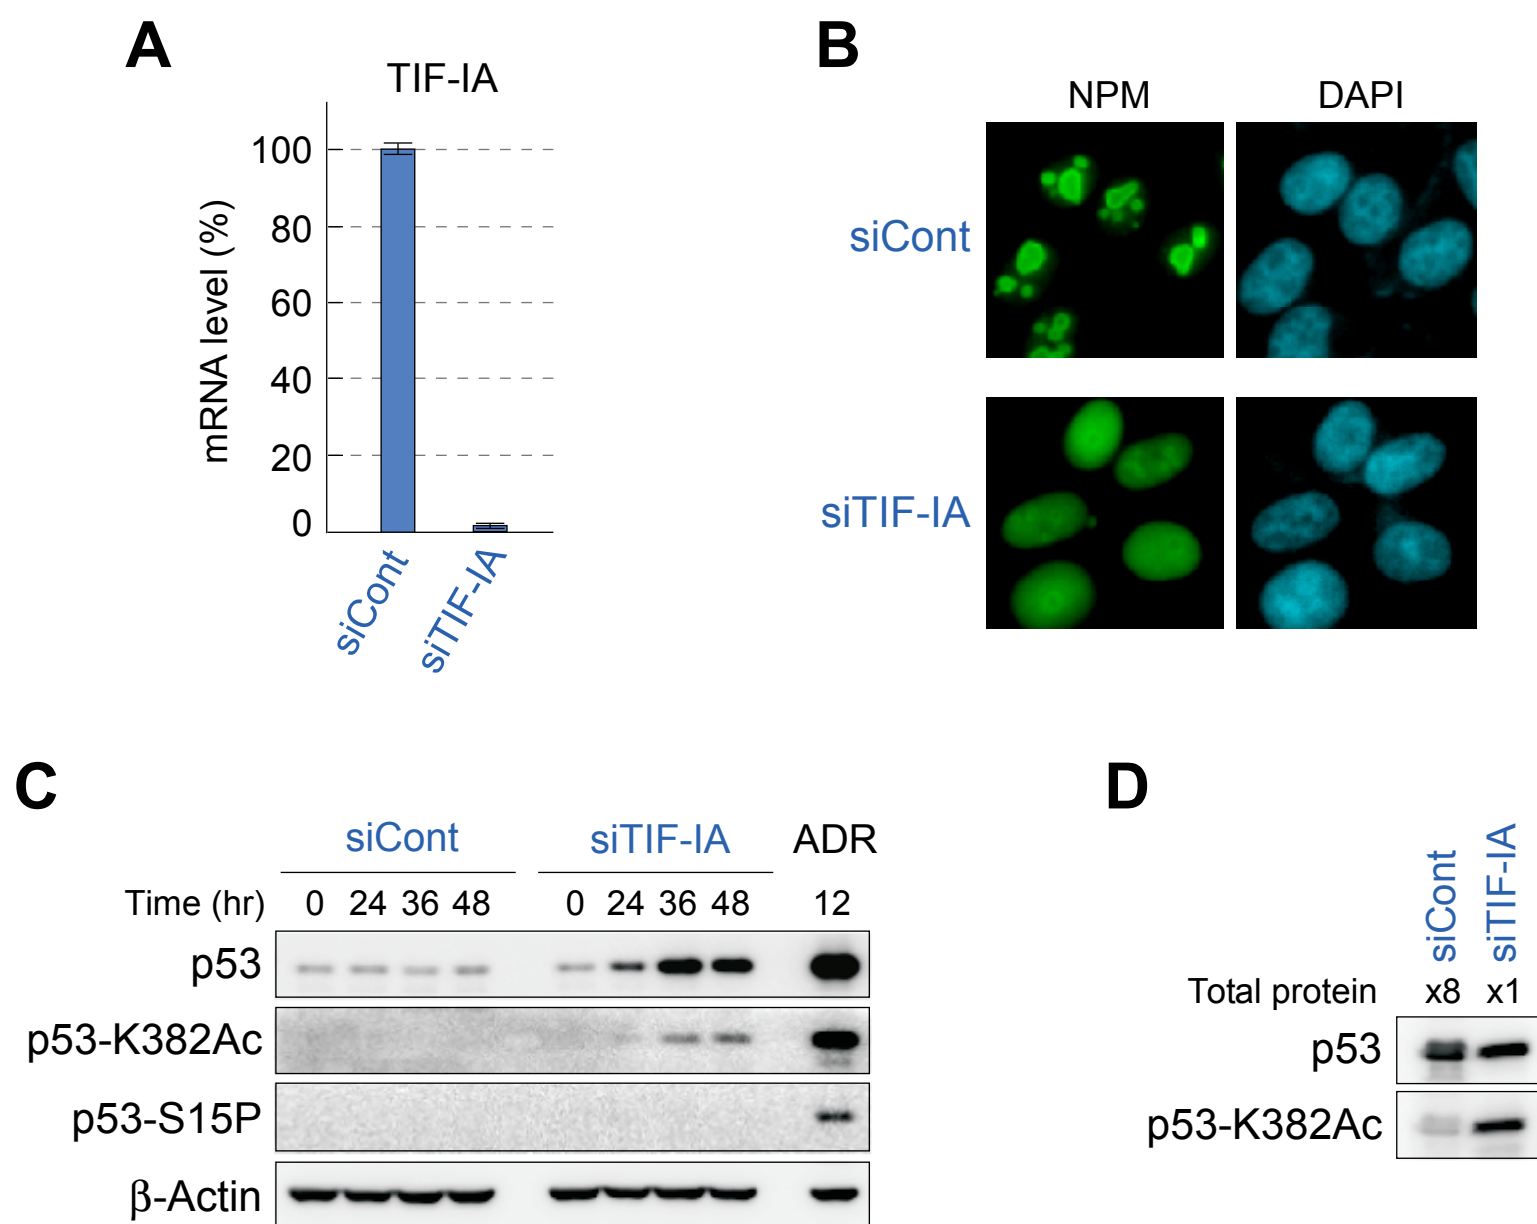

**Supplementary Figure S2** Nucleolar disruption induced by TIF-IA knockdown causes acetylation of p53 protein without phosphorylation. **(A)** Knockdown efficiency of TIF-IA siRNA. MCF-7 cells were treated with siCont or siTIF-IA for 48 hours, and the mRNA levels were determined by RT-qPCR. The mRNA levels were normalized to  $\beta$ -Actin. Values are given as the mean  $\pm$  SD for triplicate experiments. **(B)** Nucleolar structure was disrupted in TIF-IA siRNA treated cells. MCF-7 cells were treated with siCont or siTIF-IA for 48 hours, and the localization of NPM was visualized by immunofluorescence using an anti-NPM antibody. **(C)** Knockdown of TIF-IA induced accumulation and acetylation but not phosphorylation of p53 protein. MCF-7 cells were treated with siCont or siTIF-IA for the indicated times, and the cell lysates were analyzed by immunoblot using the indicated antibodies. Lysates prepared from ADR (0.5  $\mu$ g/ml)-treated cells were used as a positive control. **(D)** Knockdown of TIF-IA induced acetylation of p53 protein. MCF-7 cells were treated with siCont or siTIF-IA for 48 hours. An equal amount of p53 was loaded, and acetylation levels were analyzed by immunoblot using an anti-acetylated p53 antibody.



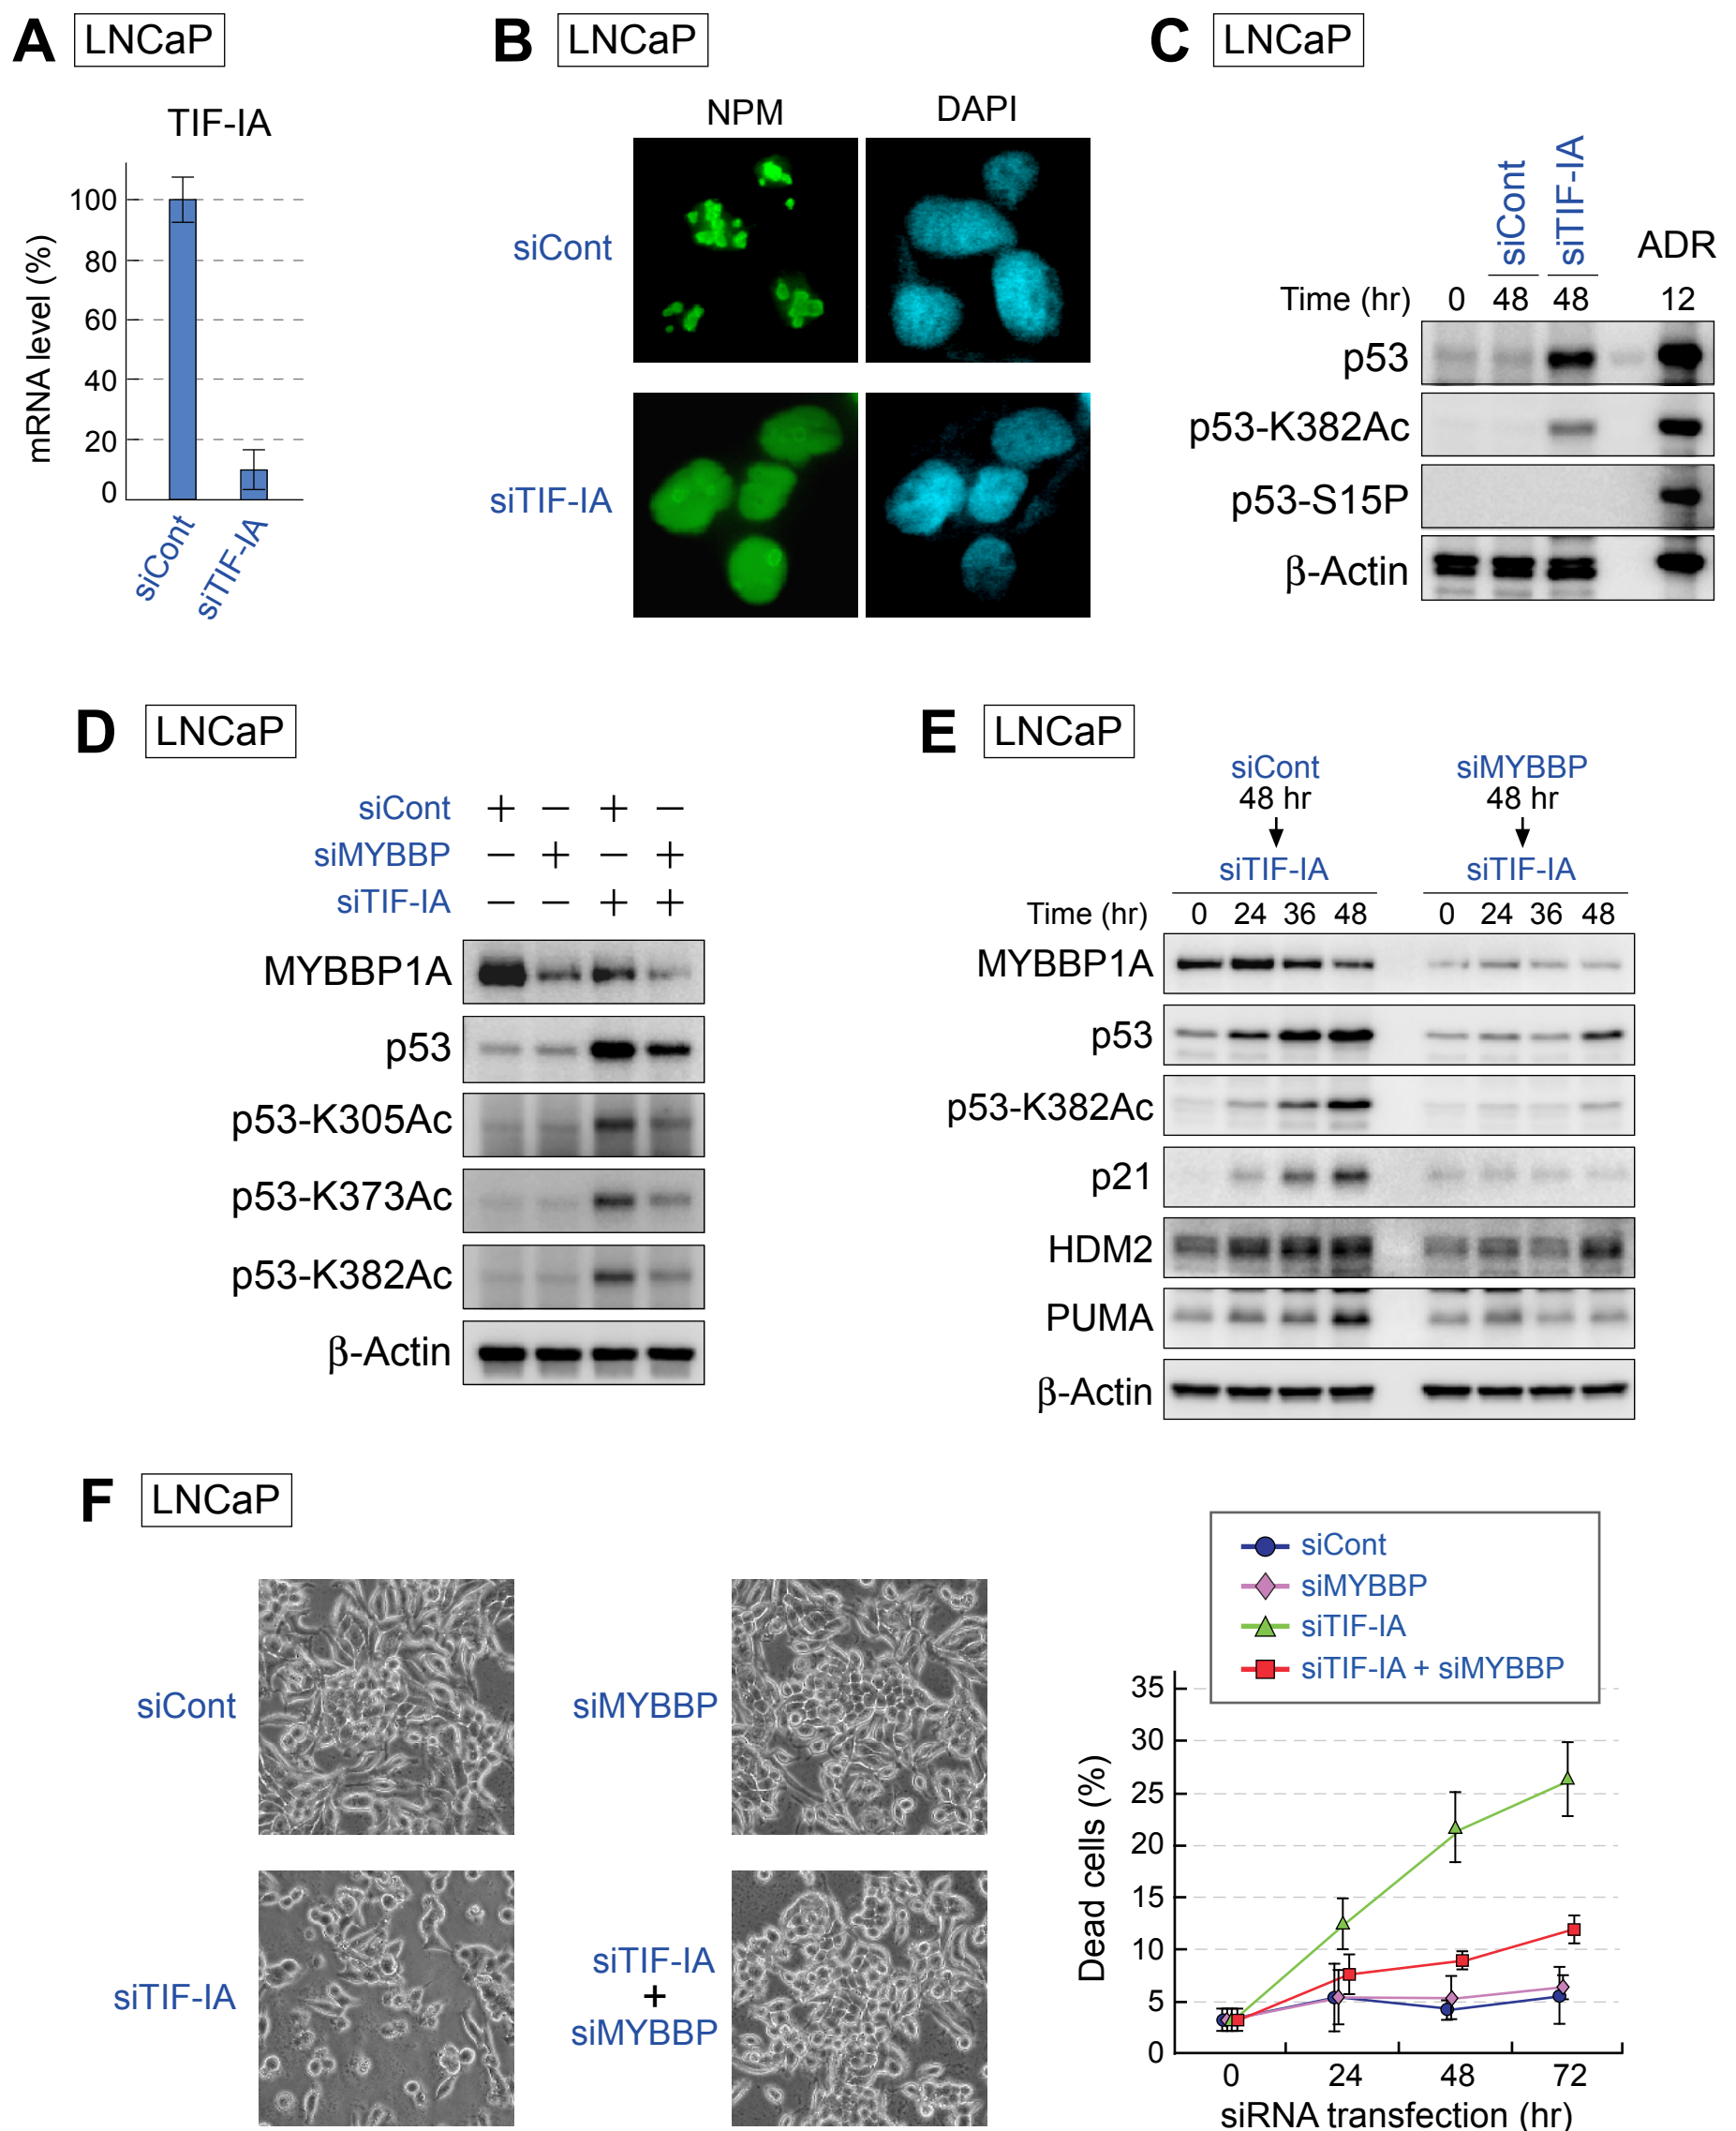

**Supplementary Figure S3** MYBBP1A is necessary for the acetylation and transactivation of p53 and nucleolar stress-induced apoptosis in LNCaP cells. **(A)** Knockdown efficiency of TIF-IA siRNA in LNCaP cells. LNCaP cells were treated with siCont or siTIF-IA for 48 hours, and the mRNA levels were determined by RT-qPCR. **(B)** Immunofluorescence analysis showed translocation of NPM in LNCaP cells treated with siTIF-IA for 48 hours. **(C)** Knockdown of TIF-IA induced accumulation and acetylation but not phosphorylation of p53 protein in LNCaP cells. Lysates prepared from ADR (0.5  $\mu$ g/ml)-treated cells were used as a positive control. **(D)** Knockdown of MYBBP1A decreased the acetylation levels at multiple lysine residues in p53 protein in LNCaP cells treated with siTIF-IA. **(E)** Knockdown of MYBBP1A reduced the elevation of p53 target gene products induced by siTIF-IA in LNCaP cells. **(F)** Knockdown of MYBBP1A decreased the level of apoptosis induced by siTIF-IA in LNCaP cells. Left: the phase-contrast images of LNCaP cells treated with the indicated siRNAs for 72 hours. Right: the percentage of dead cells was measured by trypan blue exclusion assay. Values are given as the mean  $\pm$  SD for triplicate experiments.

**A**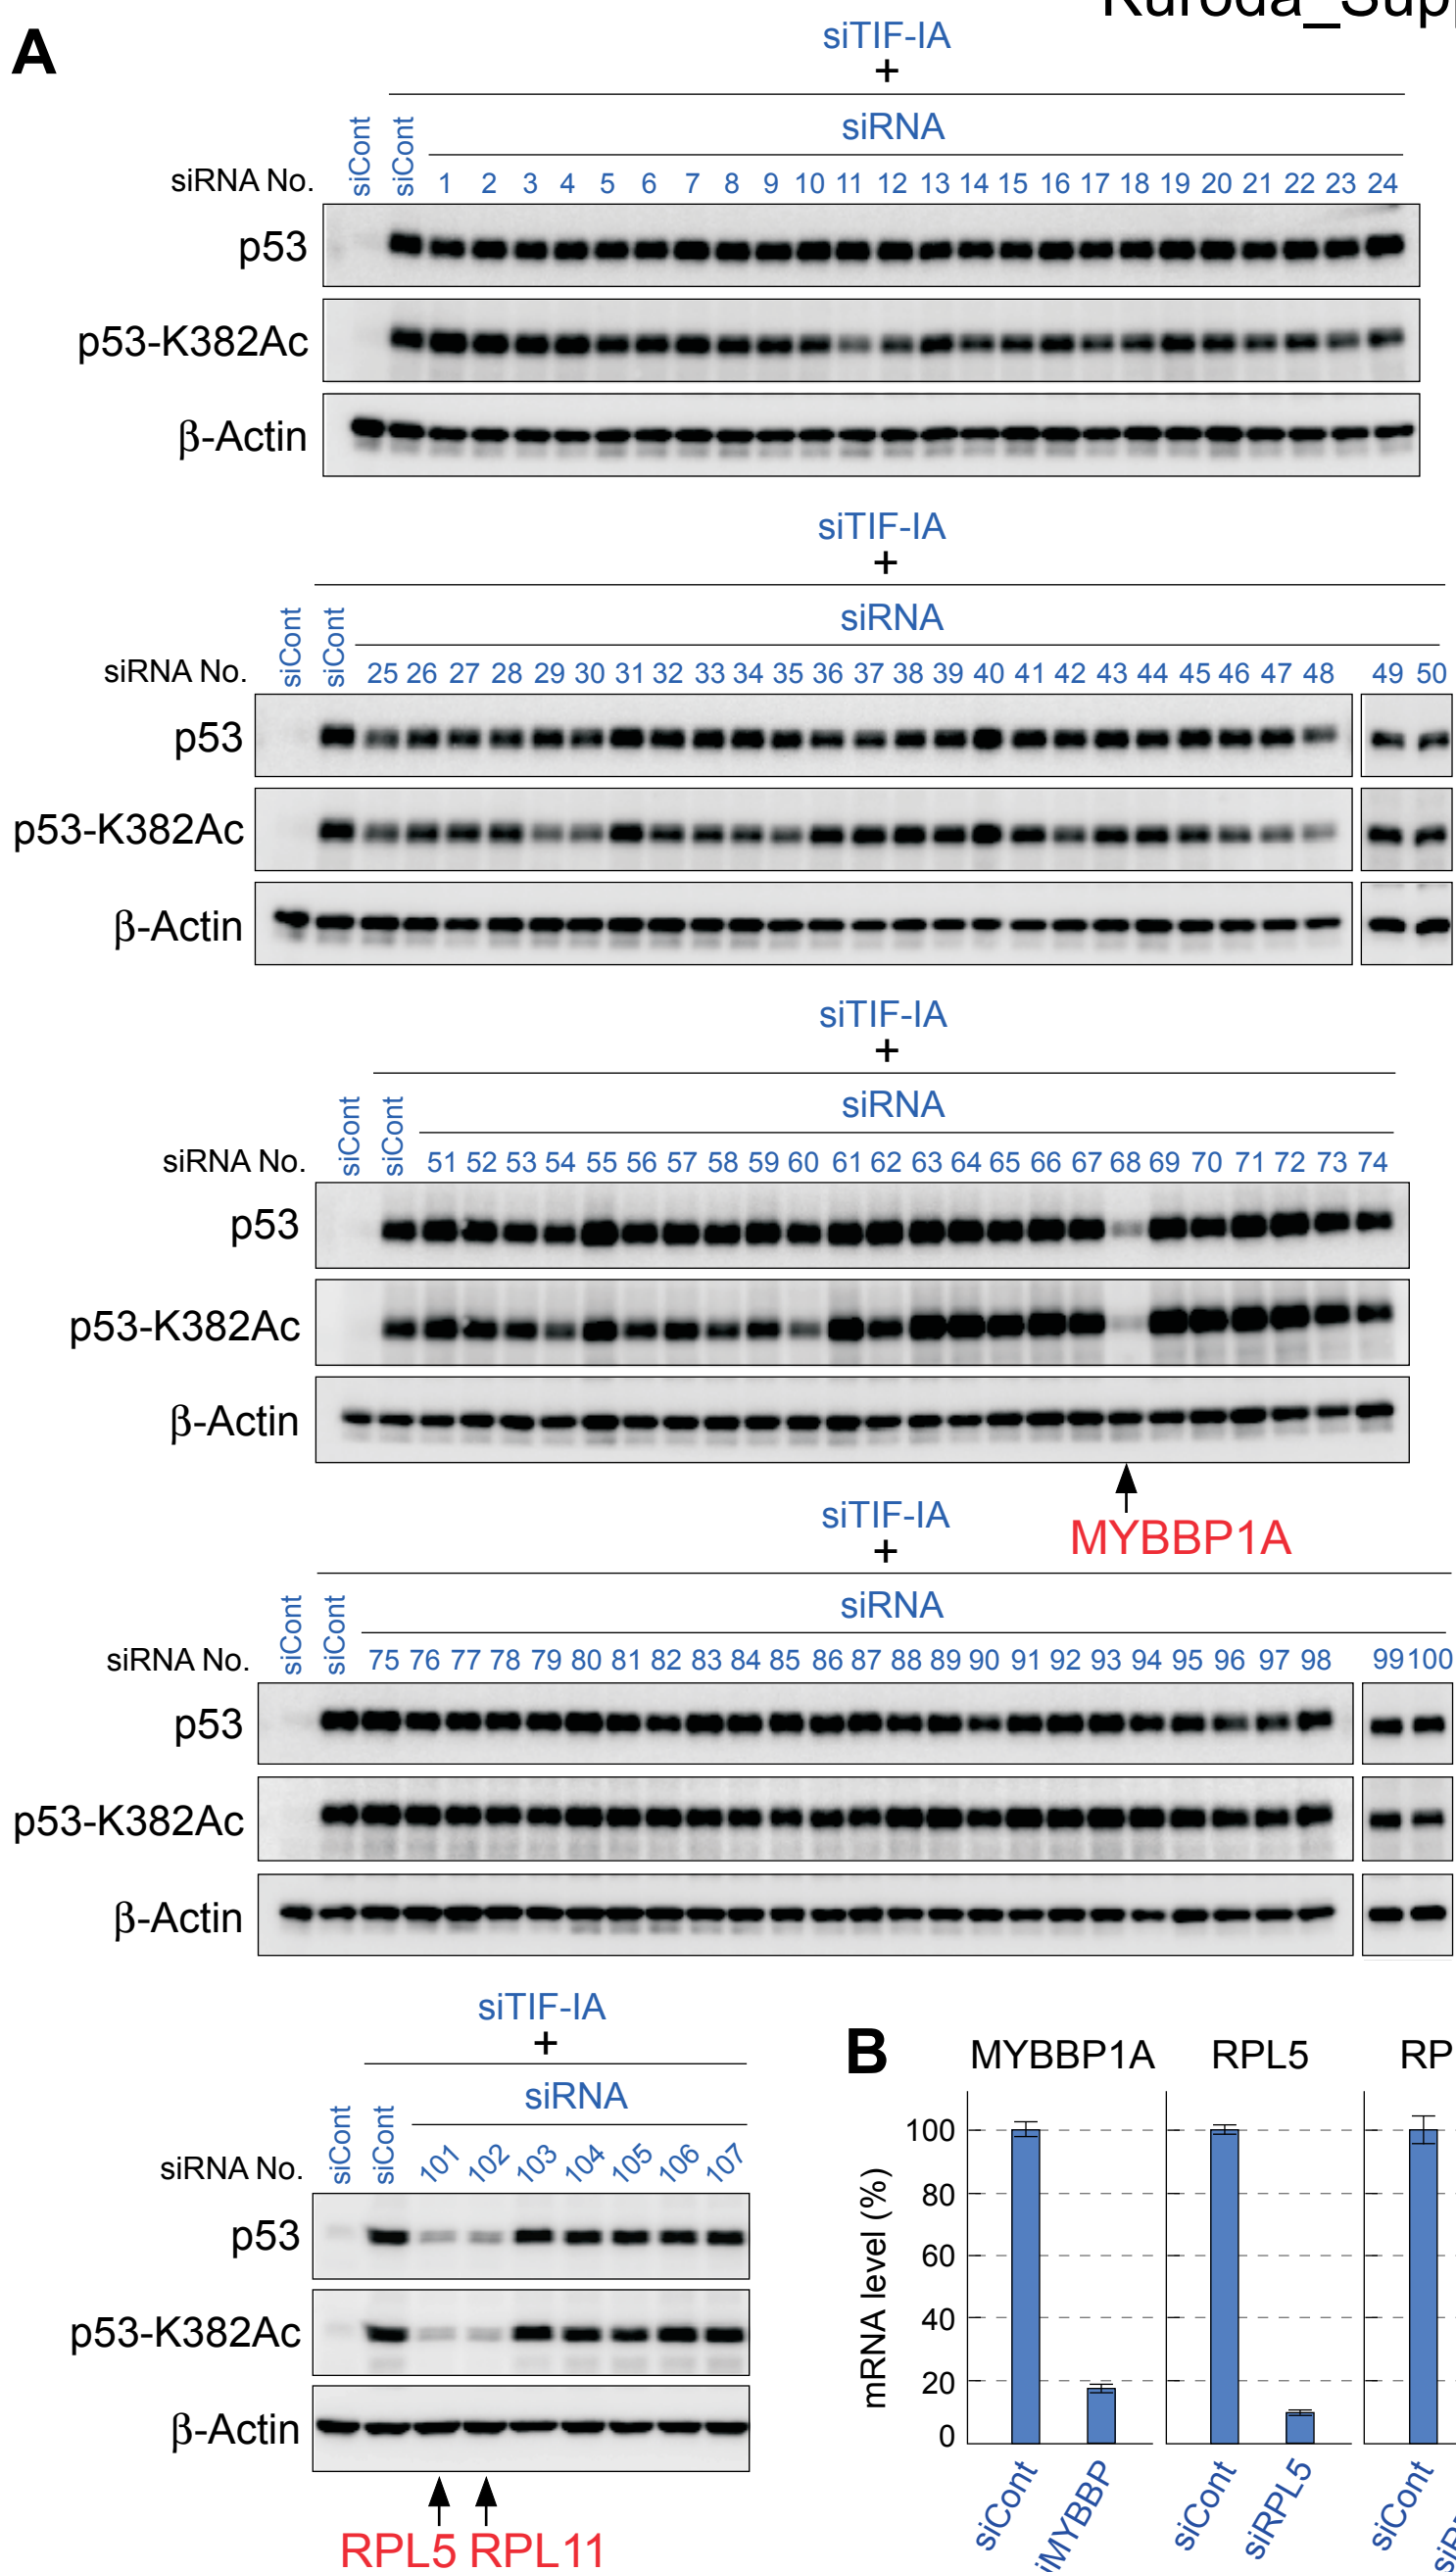**B**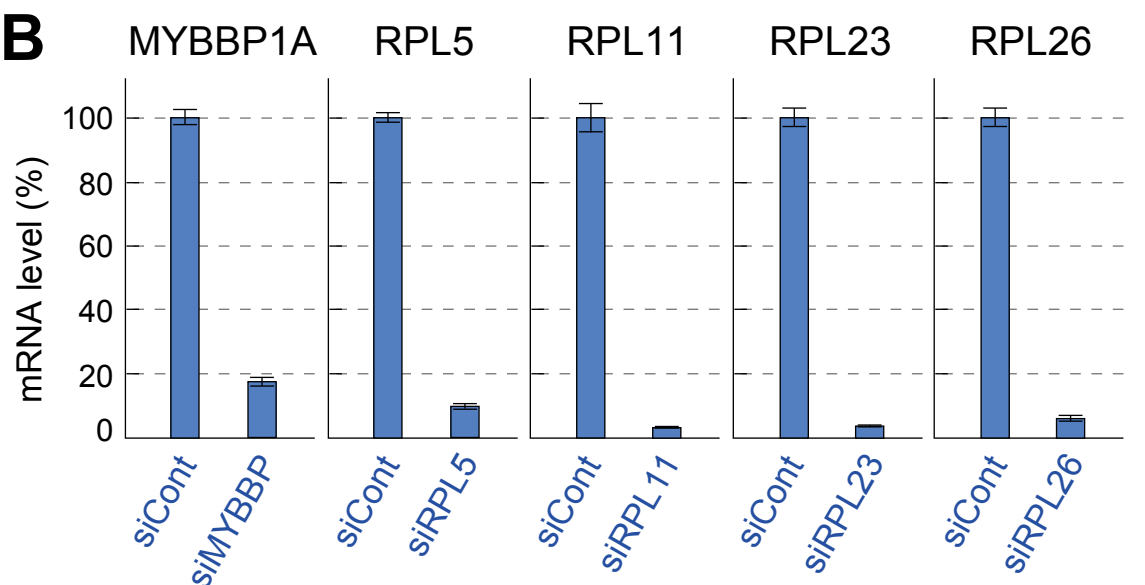

**Supplementary Figure S4** Identification of nucleolar proteins that are involved in p53 acetylation and accumulation. **(A)** MCF-7 cells were treated with each siRNA and siTIF-IA for 48 hours, and the cell lysates were analyzed by immunoblot using anti-p53 and anti-acetylated p53 antibodies. #68 is siRNA against MYBBP1A. #101 and #102 are siRNAs against RPL5 and RPL11, respectively. **(B)** Knockdown efficiency of MYBBP1A, RPL5, RPL11, RPL23, or RPL26 siRNA, respectively. MCF-7 cells were treated with the indicated siRNAs for 48 hours, and the mRNA levels were determined by RT-qPCR. The mRNA levels were normalized to β-Actin. Values are given as the mean  $\pm$  SD for triplicate experiments.

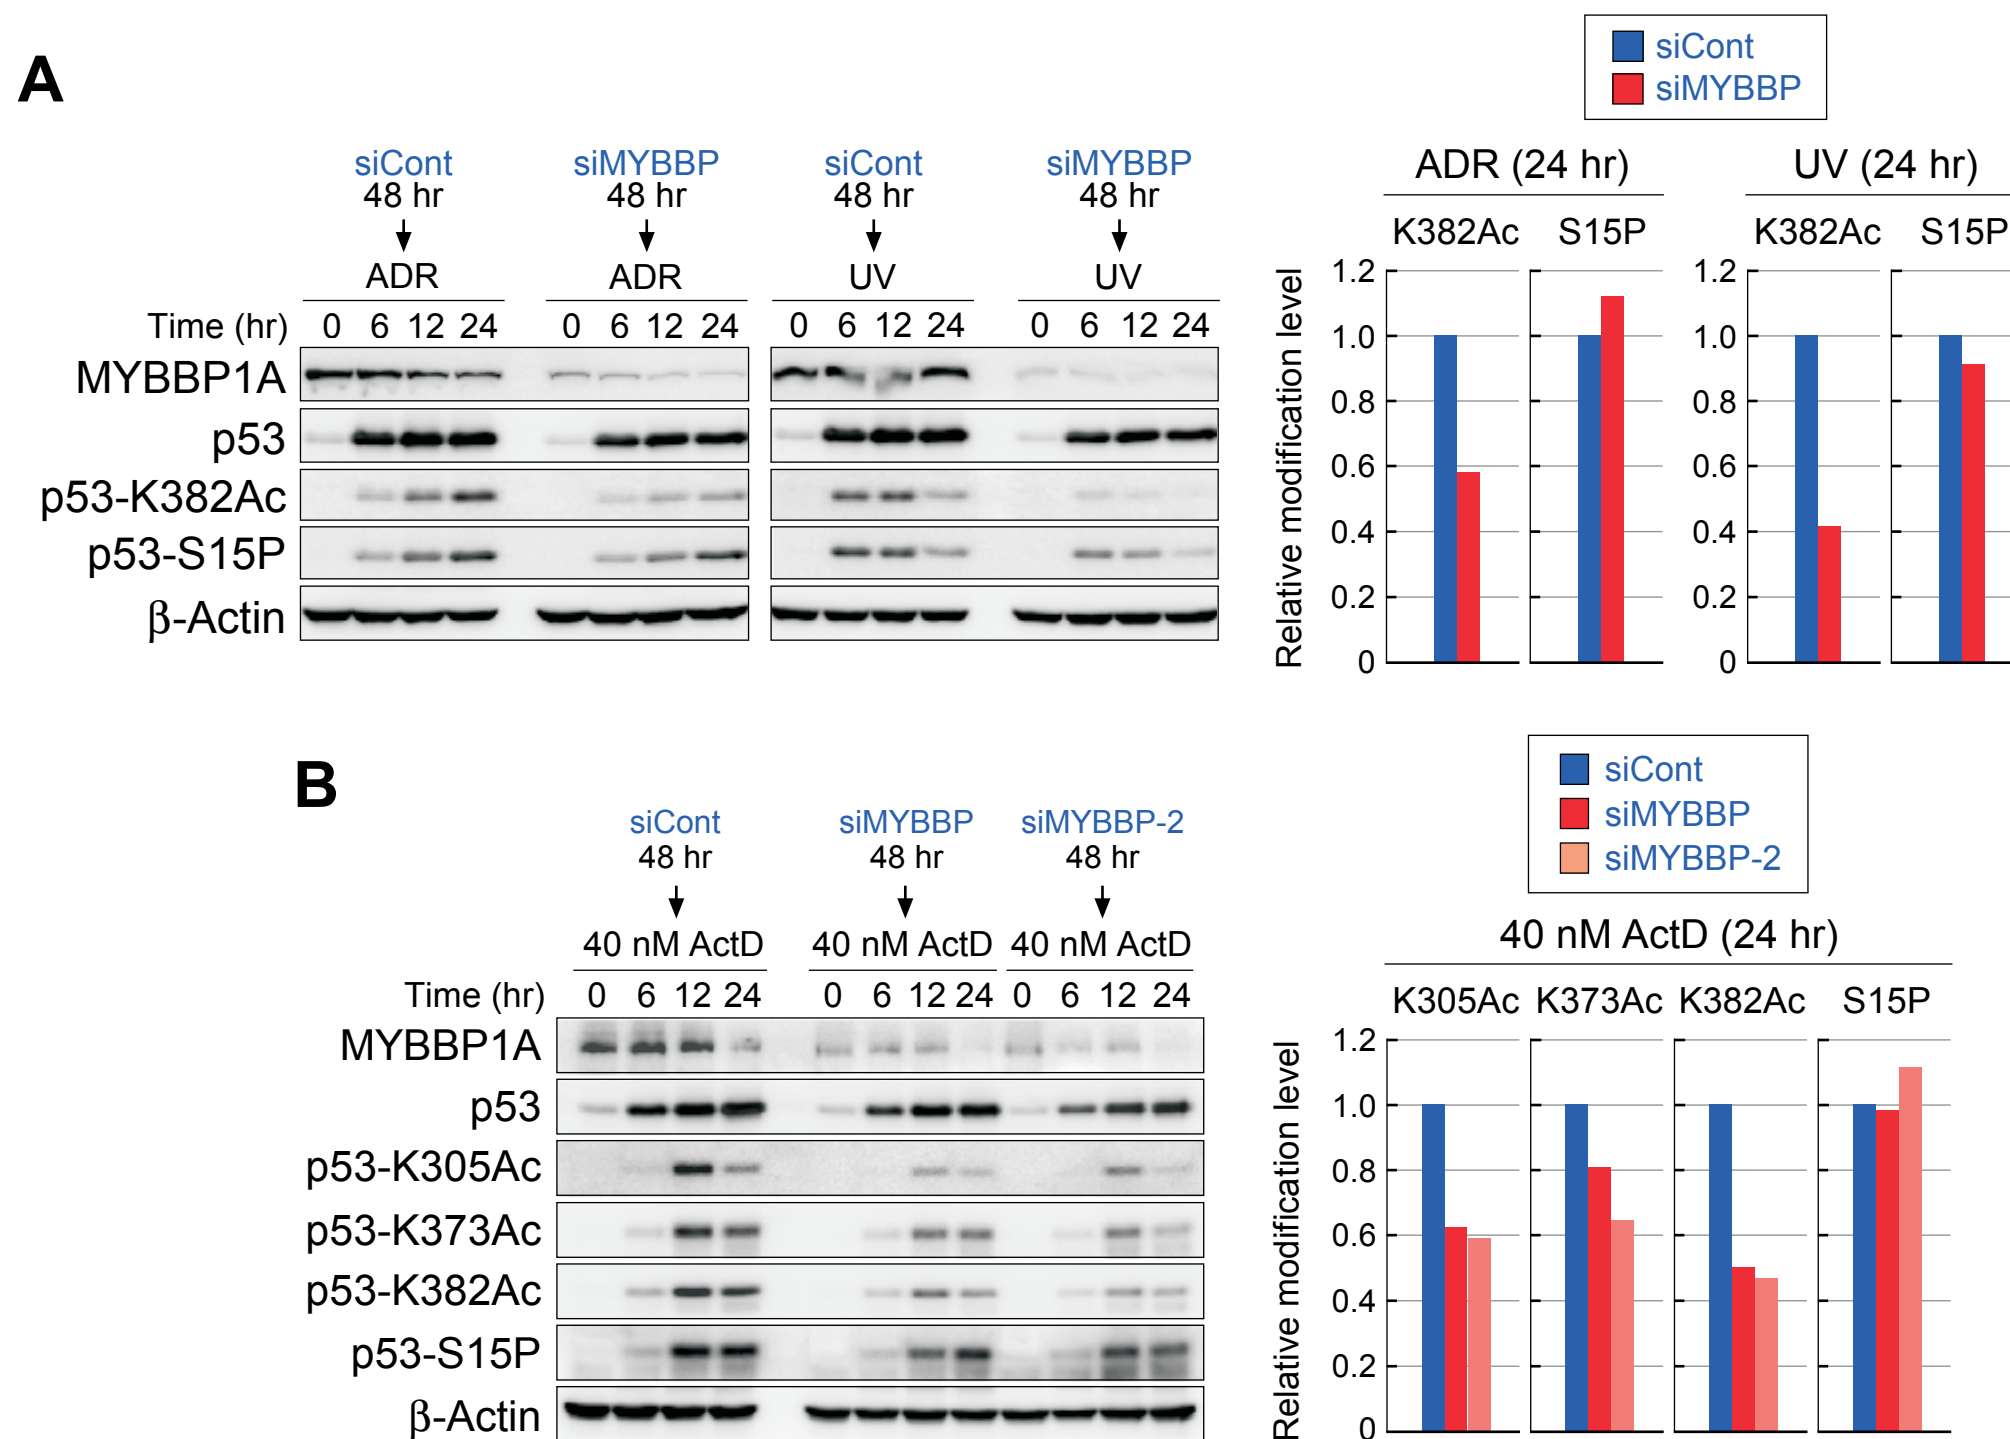

**Supplementary Figure S5** MYBBP1A is necessary for the acetylation and accumulation of p53 induced by nucleolar stress. **(A)** Knockdown of MYBBP1A decreased p53 acetylation levels induced by ADR or UV treatment. Left: MCF-7 cells were treated with the siCont or siMYBBBP for 48 hours. The cells were then treated with ADR (0.5  $\mu\text{g}/\text{ml}$ ) or UV (25  $\text{J}/\text{m}^2$ ) for the indicated times. The cell lysates were analyzed by immunoblot using the indicated antibodies. Right: relative quantification of acetylation and phosphorylation levels of p53 protein. Twenty-four hours after ADR or UV treatment, the intensity of the acetylated or phosphorylated p53 proteins were quantified by phosphoimager analysis and plotted. The intensities of the modified p53 proteins were corrected using p53 protein level. The intensity of the siCont-treated cells was normalized to 1.0. **(B)** Knockdown of MYBBP1A decreased the acetylation levels at multiple lysine residues in p53 protein by 40 nM ActD treatment. Left: MCF-7 cells were treated with siCont or two independent siMYBBBP (siMYBBBP and siMYBBBP-2) for 48 hours, followed by 40 nM ActD treatment at the indicated times. The cell lysates were analyzed by immunoblot using the indicated antibodies. Right: relative quantification of acetylation and phosphorylation levels of p53 protein. Twenty-four hours after 40 nM ActD treatment, the intensity of the modified p53 proteins were quantified as (A).

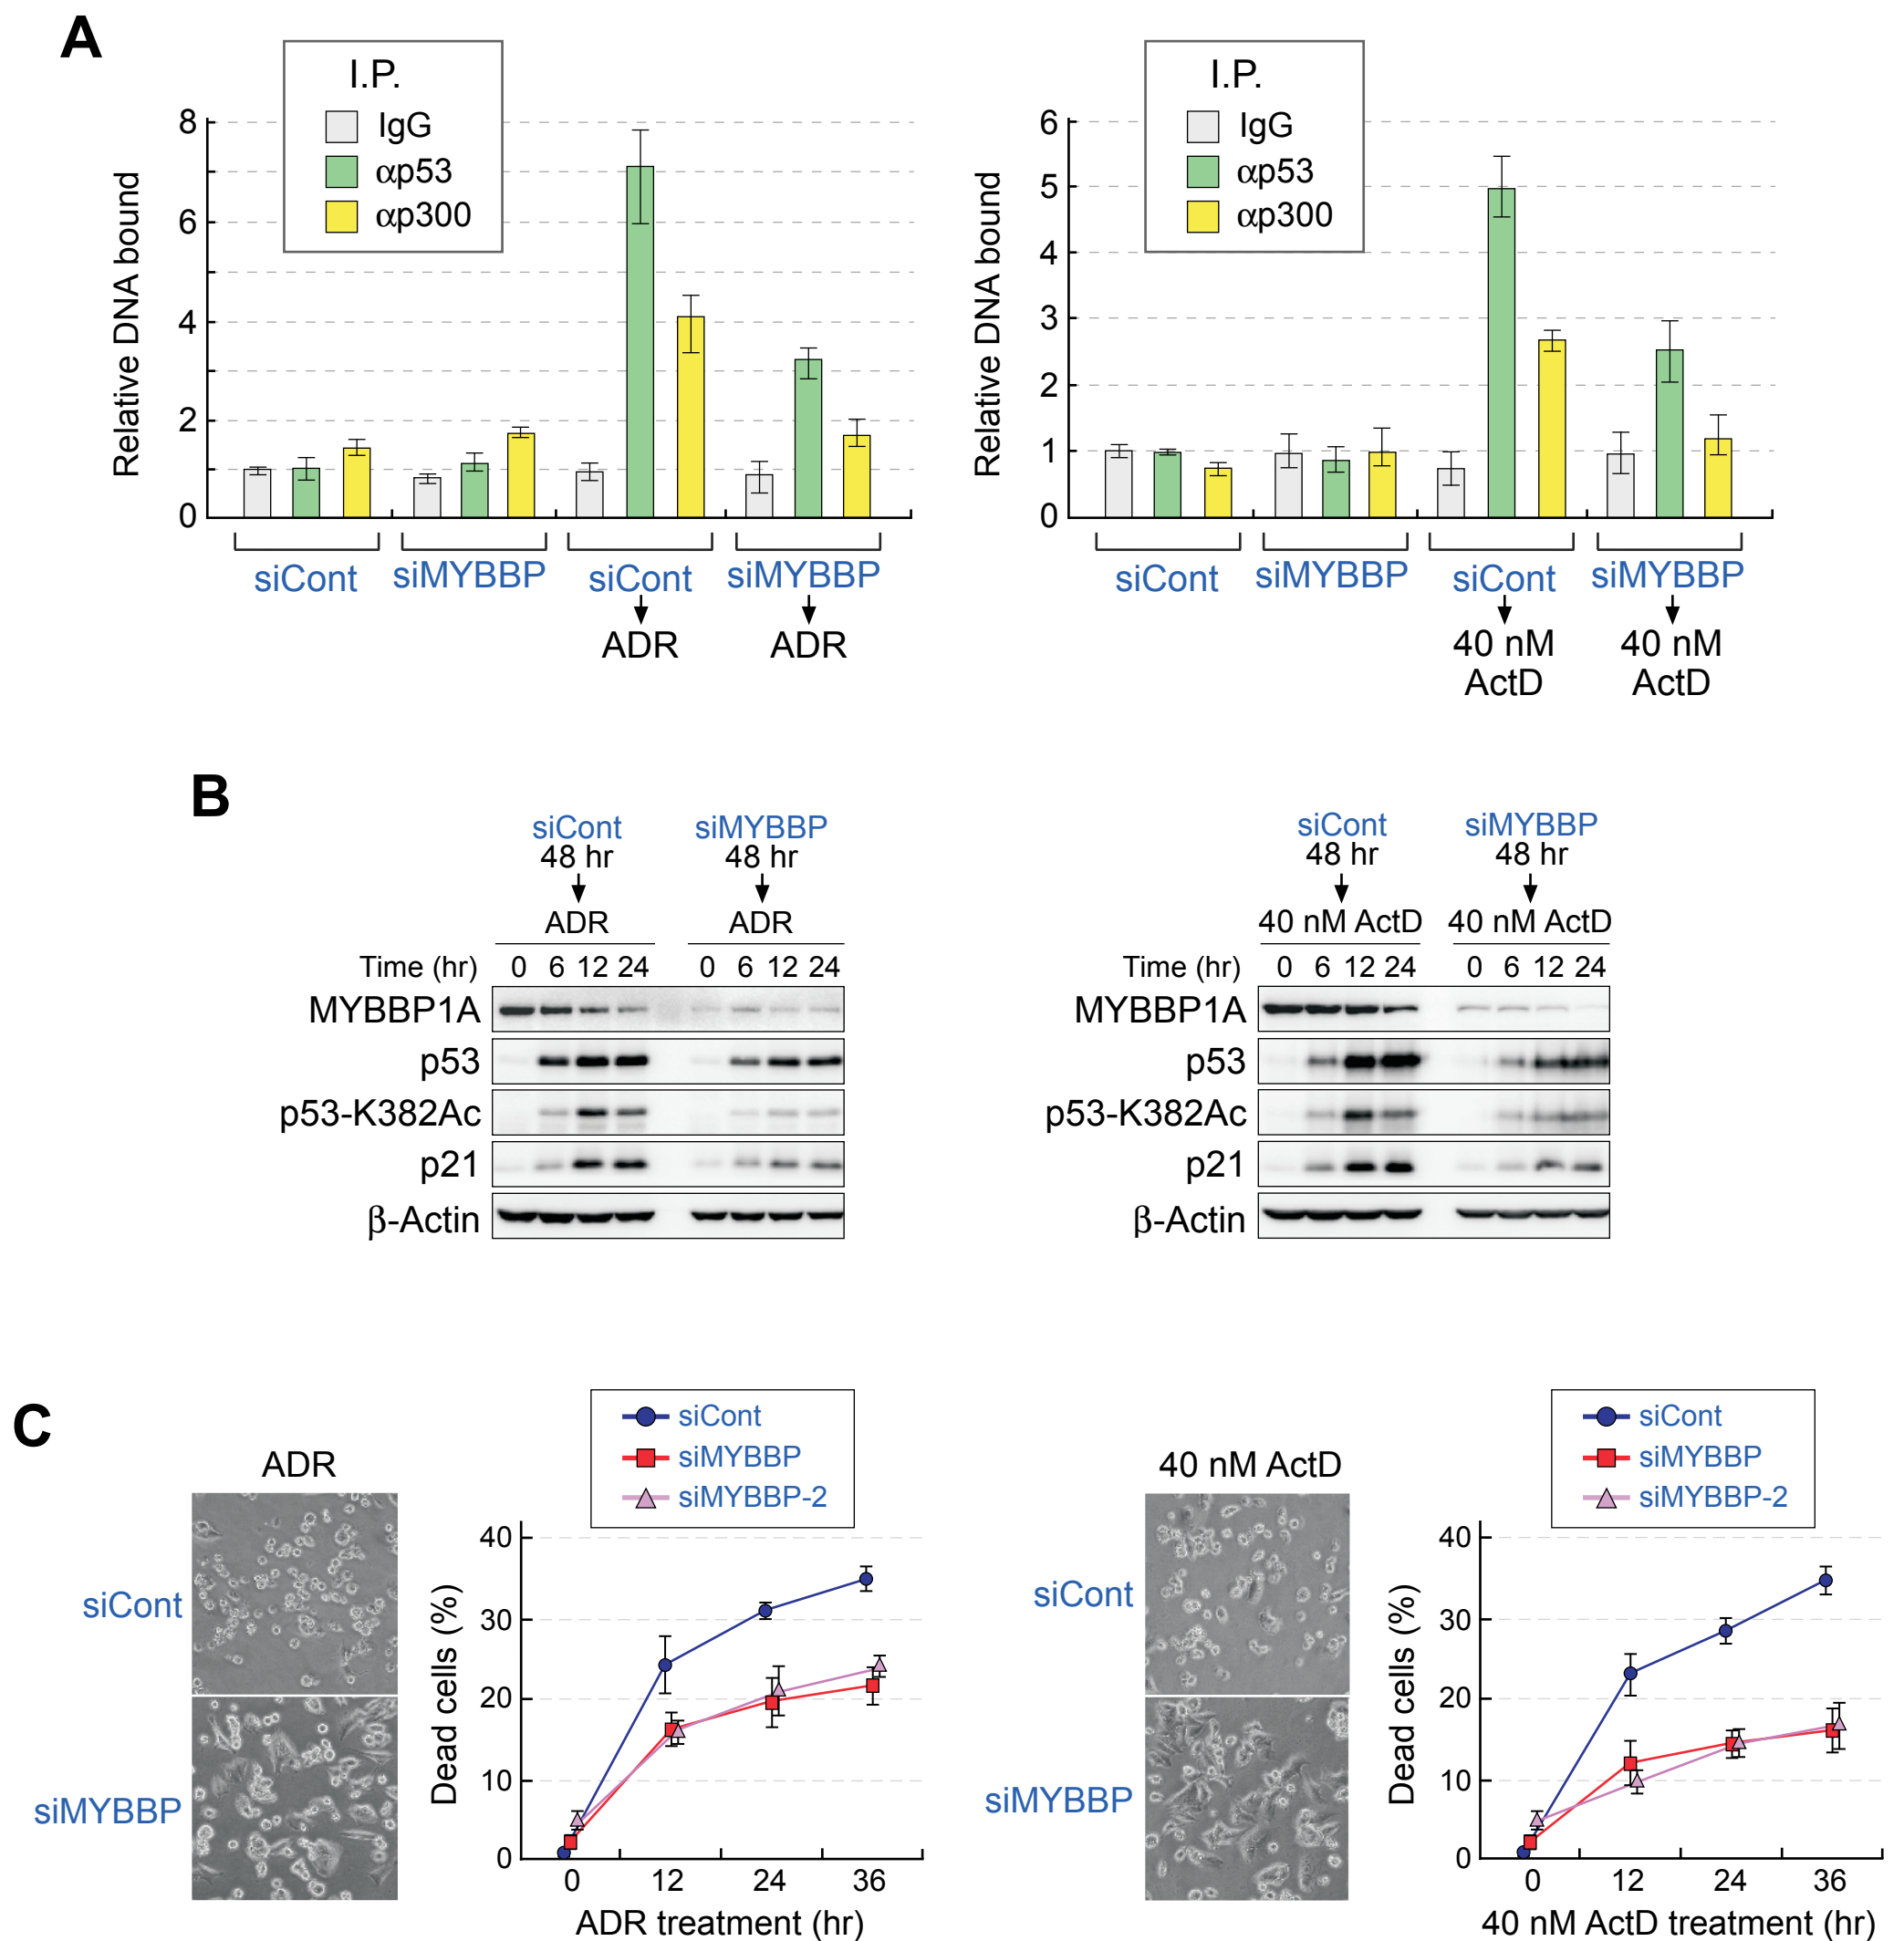

**Supplementary Figure S6** MYBBP1A is necessary for the acetylation and transactivation of p53 and apoptosis induced by ADR or ActD. **(A)** Knockdown of MYBBP1A reduced the recruitment of p53 and p300 to the *p21* promoter in the ADR- or ActD-treated cells. MCF-7 cells were treated with siCont or siMYBBP for 48 hours prior to treatment with ADR (0.5  $\mu\text{g/ml}$ ) for 12 hours or ActD (40 nM) for 24 hours. A ChIP assay was performed using normal rabbit IgG, anti-p53, or anti-p300 antibodies. The p53-binding region of the *p21* promoter was amplified and analyzed by qPCR. Values are given as the means  $\pm$  SD for triplicate experiments. **(B)** Knockdown of MYBBP1A reduced the elevation of p21 protein levels induced by ADR or ActD treatment. MCF-7 cells were treated with siCont or siMYBBP for 48 hours prior to treatment with ADR (0.5  $\mu\text{g/ml}$ ) or ActD (40 nM) for the indicated times. The cell lysates were prepared and analyzed by immunoblot using the indicated antibodies. **(C)** Knockdown of MYBBP1A decreased the level of apoptosis induced by ADR or ActD treatment. Left photos: the phase-contrast images of MCF-7 cells treated with the indicated siRNAs for 48 hours, and then treated with ADR (0.5  $\mu\text{g/ml}$ ) or ActD (40 nM) for 36 hours. Representative images are shown. Right graphs: percentage of dead cells. The percentage of dead cells was measured by trypan blue exclusion assay. Values are given as the mean  $\pm$  SD for triplicate experiments.

**A**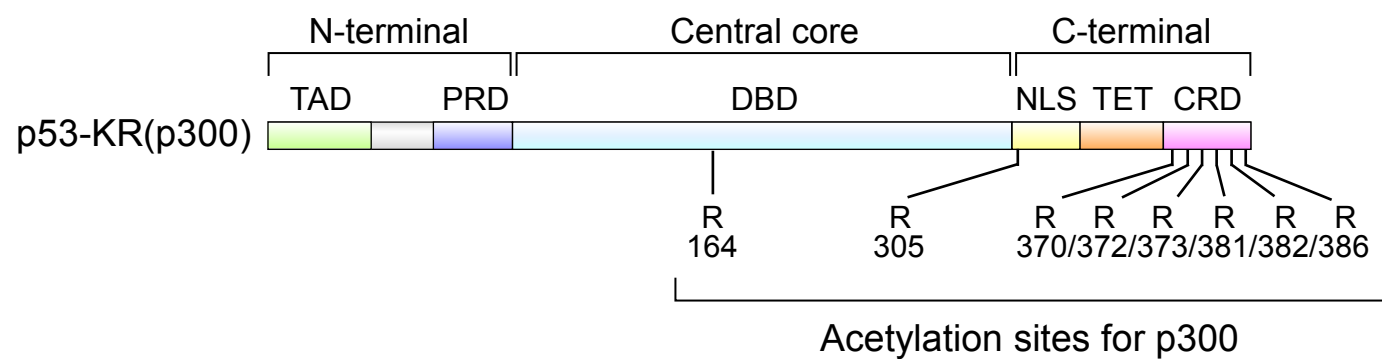**B**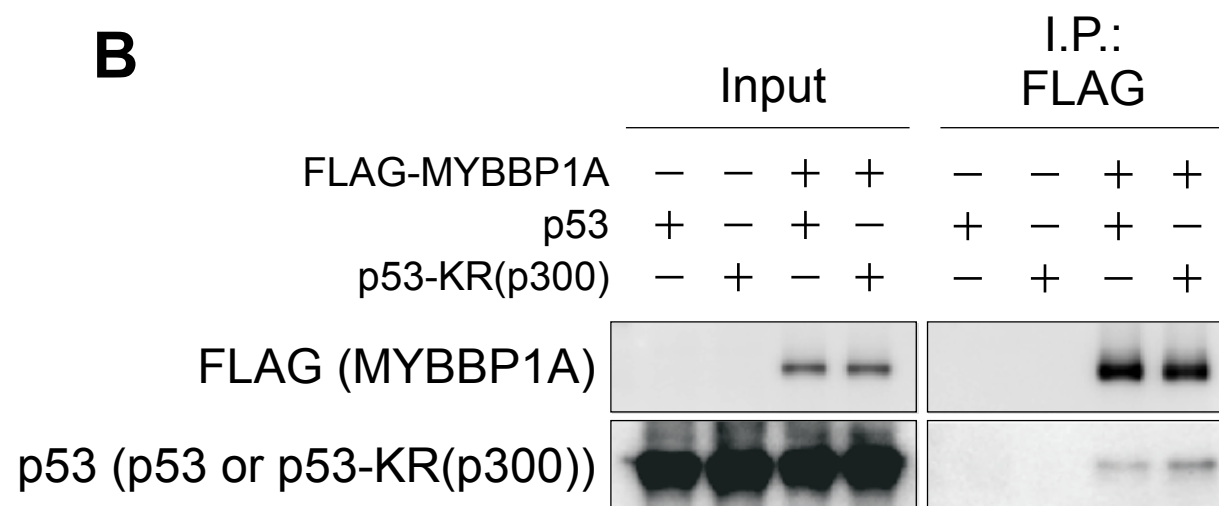

**Supplementary Figure S7** MYBBP1A interacts with p53-KR(p300). **(A)** Schematic representation of the p53-KR(300) mutant. We generated p53 lysine-to-arginine mutant at eight acetylation sites for p300. **(B)** MYBBP1A interacted with p53-KR(p300). H1299 cells were transfected with combination of the expression vectors for FLAG-MYBBP1A, p53, and/or p53-KR(300), as indicated. Twenty-four hours after transfection, the cells were treated with ADR (0.5  $\mu$ g/ml) for 12 hours. MYBBP1A was immunoprecipitated from the cell lysates using an anti-FLAG antibody and p53 association was detected by immunoblot using an anti-p53 antibody.

**A** H1299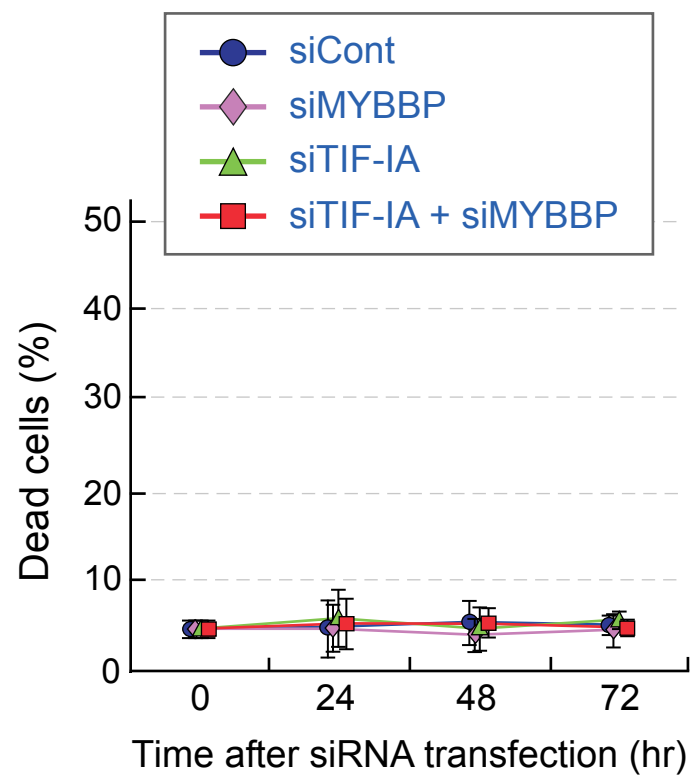**B** MCF-7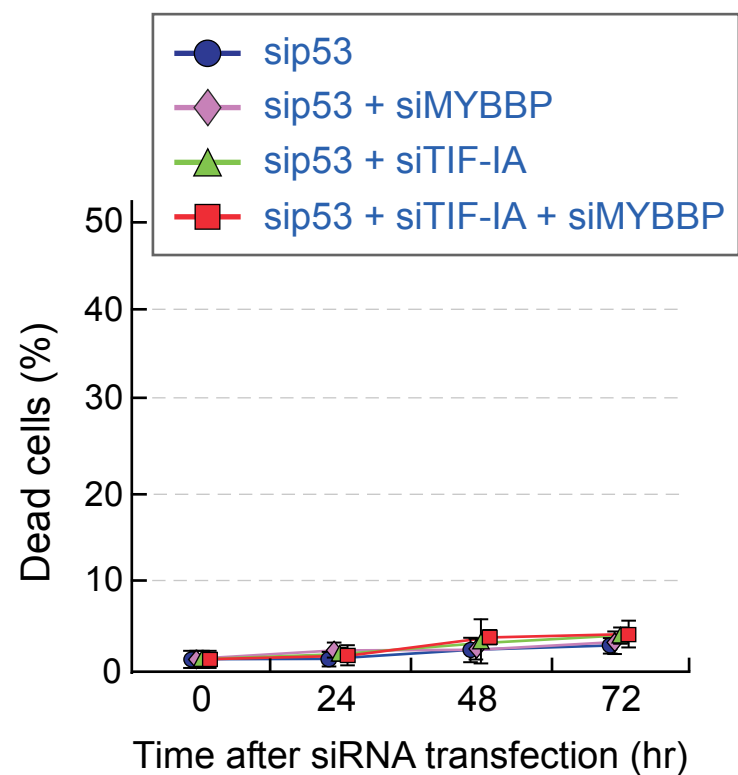

**Supplementary Figure S8** Apoptosis induced by TIF-IA knockdown is dependent on the presence of p53. (A) The percentage of dead H1299 cells. H1299 cells were transfected with the indicated siRNAs for the indicated times, and the percentage of dead cells was measured by trypan blue exclusion assay. Values are given as the mean  $\pm$  SD for triplicate experiments. (B) The percentage of dead p53-depleted MCF-7 cells. MCF-7 cells were treated with sip53 for 48 hours prior to treatment with the indicated siRNAs for the indicated times. The percentage of dead cells was measured as (A).

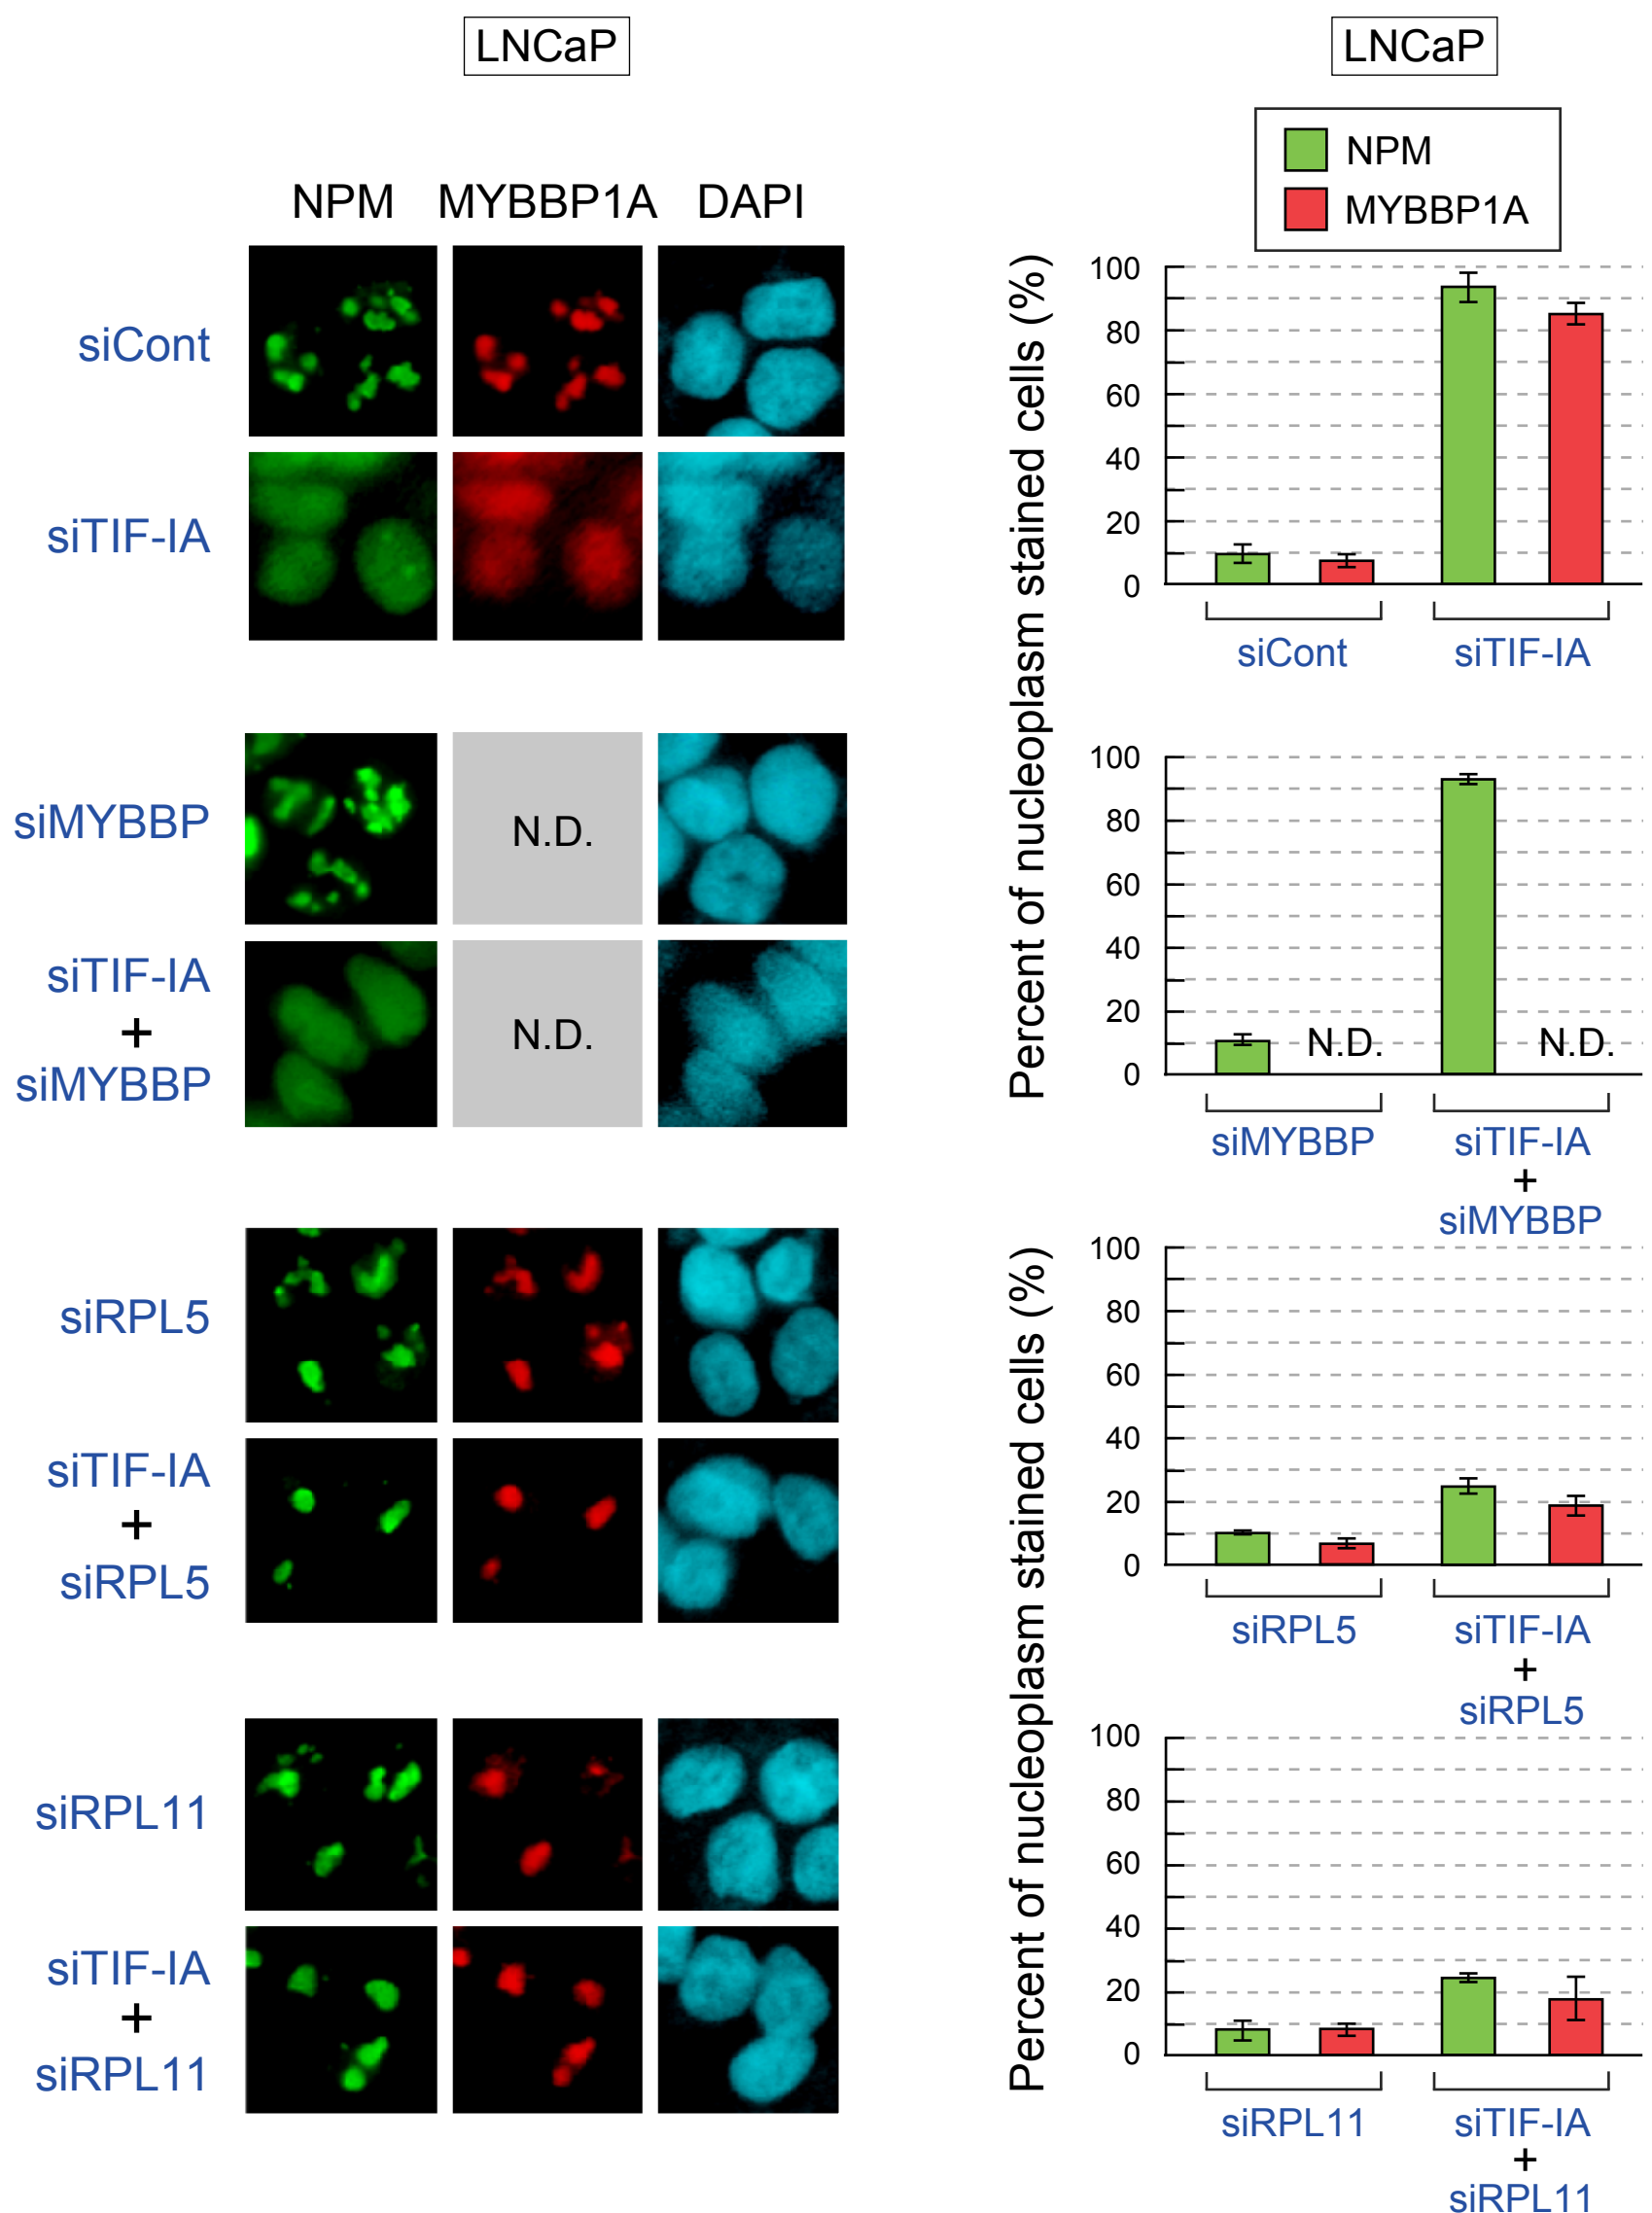

**Supplementary Figure S9** RPL5 and RPL11 are required for the MYBBP1A translocation from the nucleolus in LNCaP cells. MYBBP1A translocation from the nucleolus to the nucleoplasm induced by TIF-IA knockdown was hampered by the knockdown of RPL5 or RPL11. Left: LNCaP cells were treated with the indicated siRNAs for 48 hours, and the cells were stained with the indicated antibodies or DAPI. N.D. means “not determined”. Right: The percentage of the cells that showed translocation of NPM or MYBBP1A from the nucleolus after treatment with the indicated siRNAs. Values are given as the mean  $\pm$  SD for triplicate experiments.

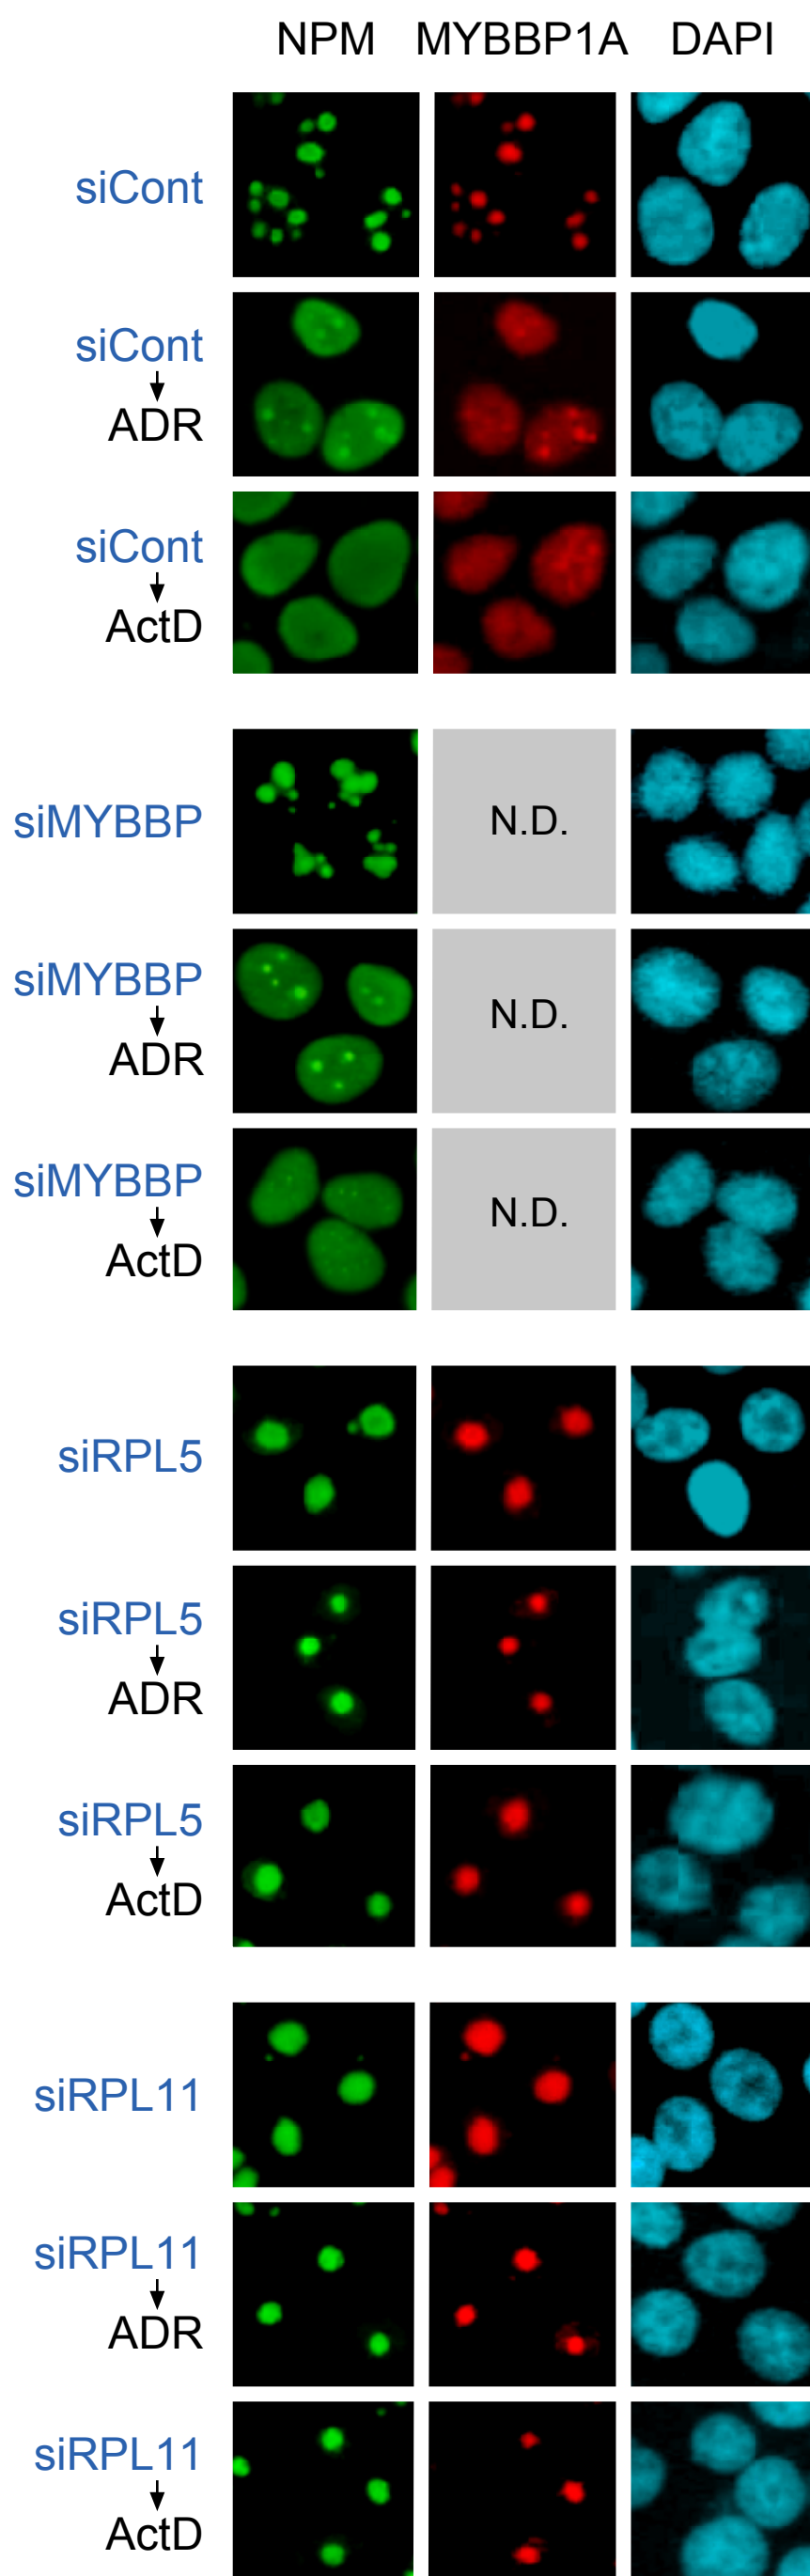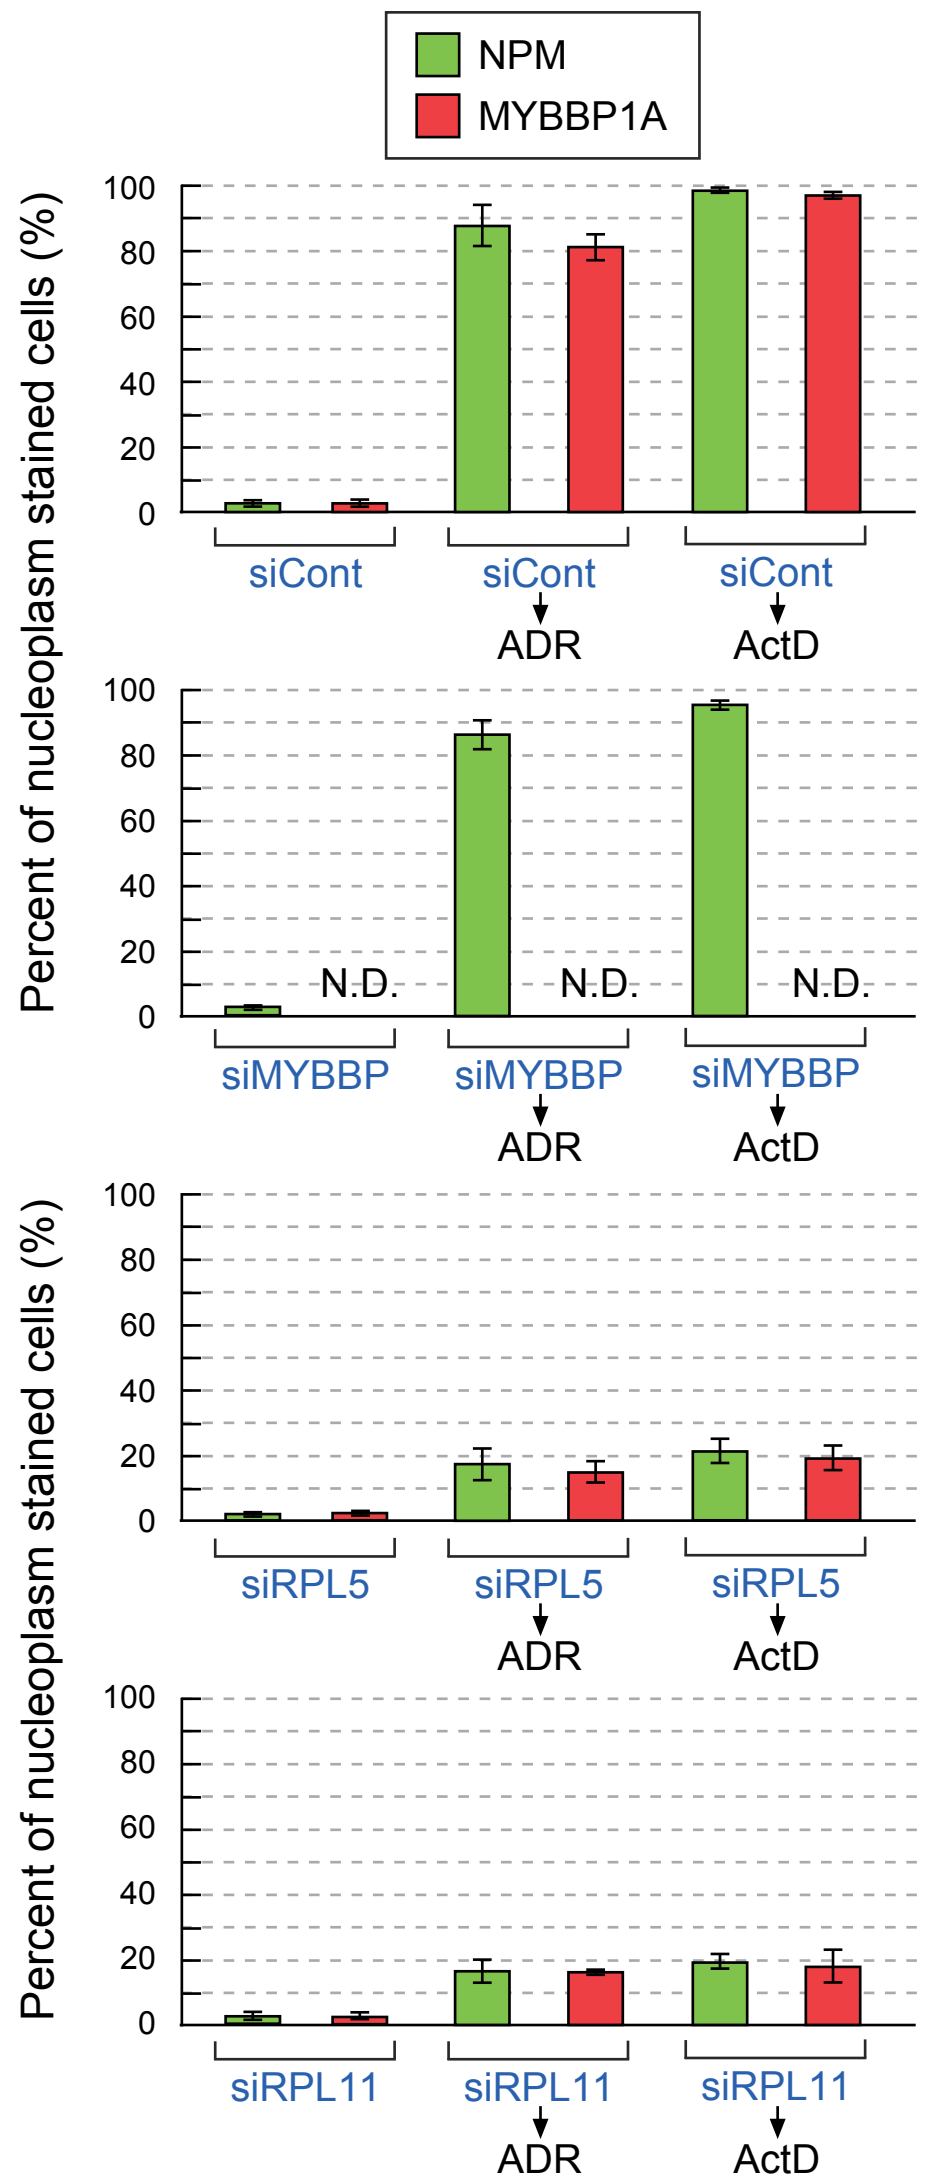

**Supplementary Figure S10** RPL5 and RPL11 are required for the MYBBP1A translocation from the nucleolus in ADR or ActD treated cells. MYBBP1A translocation from the nucleolus to the nucleoplasm induced by ADR or ActD treatment was hindered by the knockdown of RPL5 or RPL11. Left: MCF-7 cells were treated with the indicated siRNAs for 48 hours, followed by the treatment with ADR (0.5  $\mu$ g/ml) or ActD (40 nM) for 24 hours. The cells were stained with the indicated antibodies or DAPI. N.D. means "not determined". Right: The percentage of the cells that showed translocation of NPM or MYBBP1A from the nucleolus after the treatment. Values are given as the mean  $\pm$  SD for triplicate experiments.



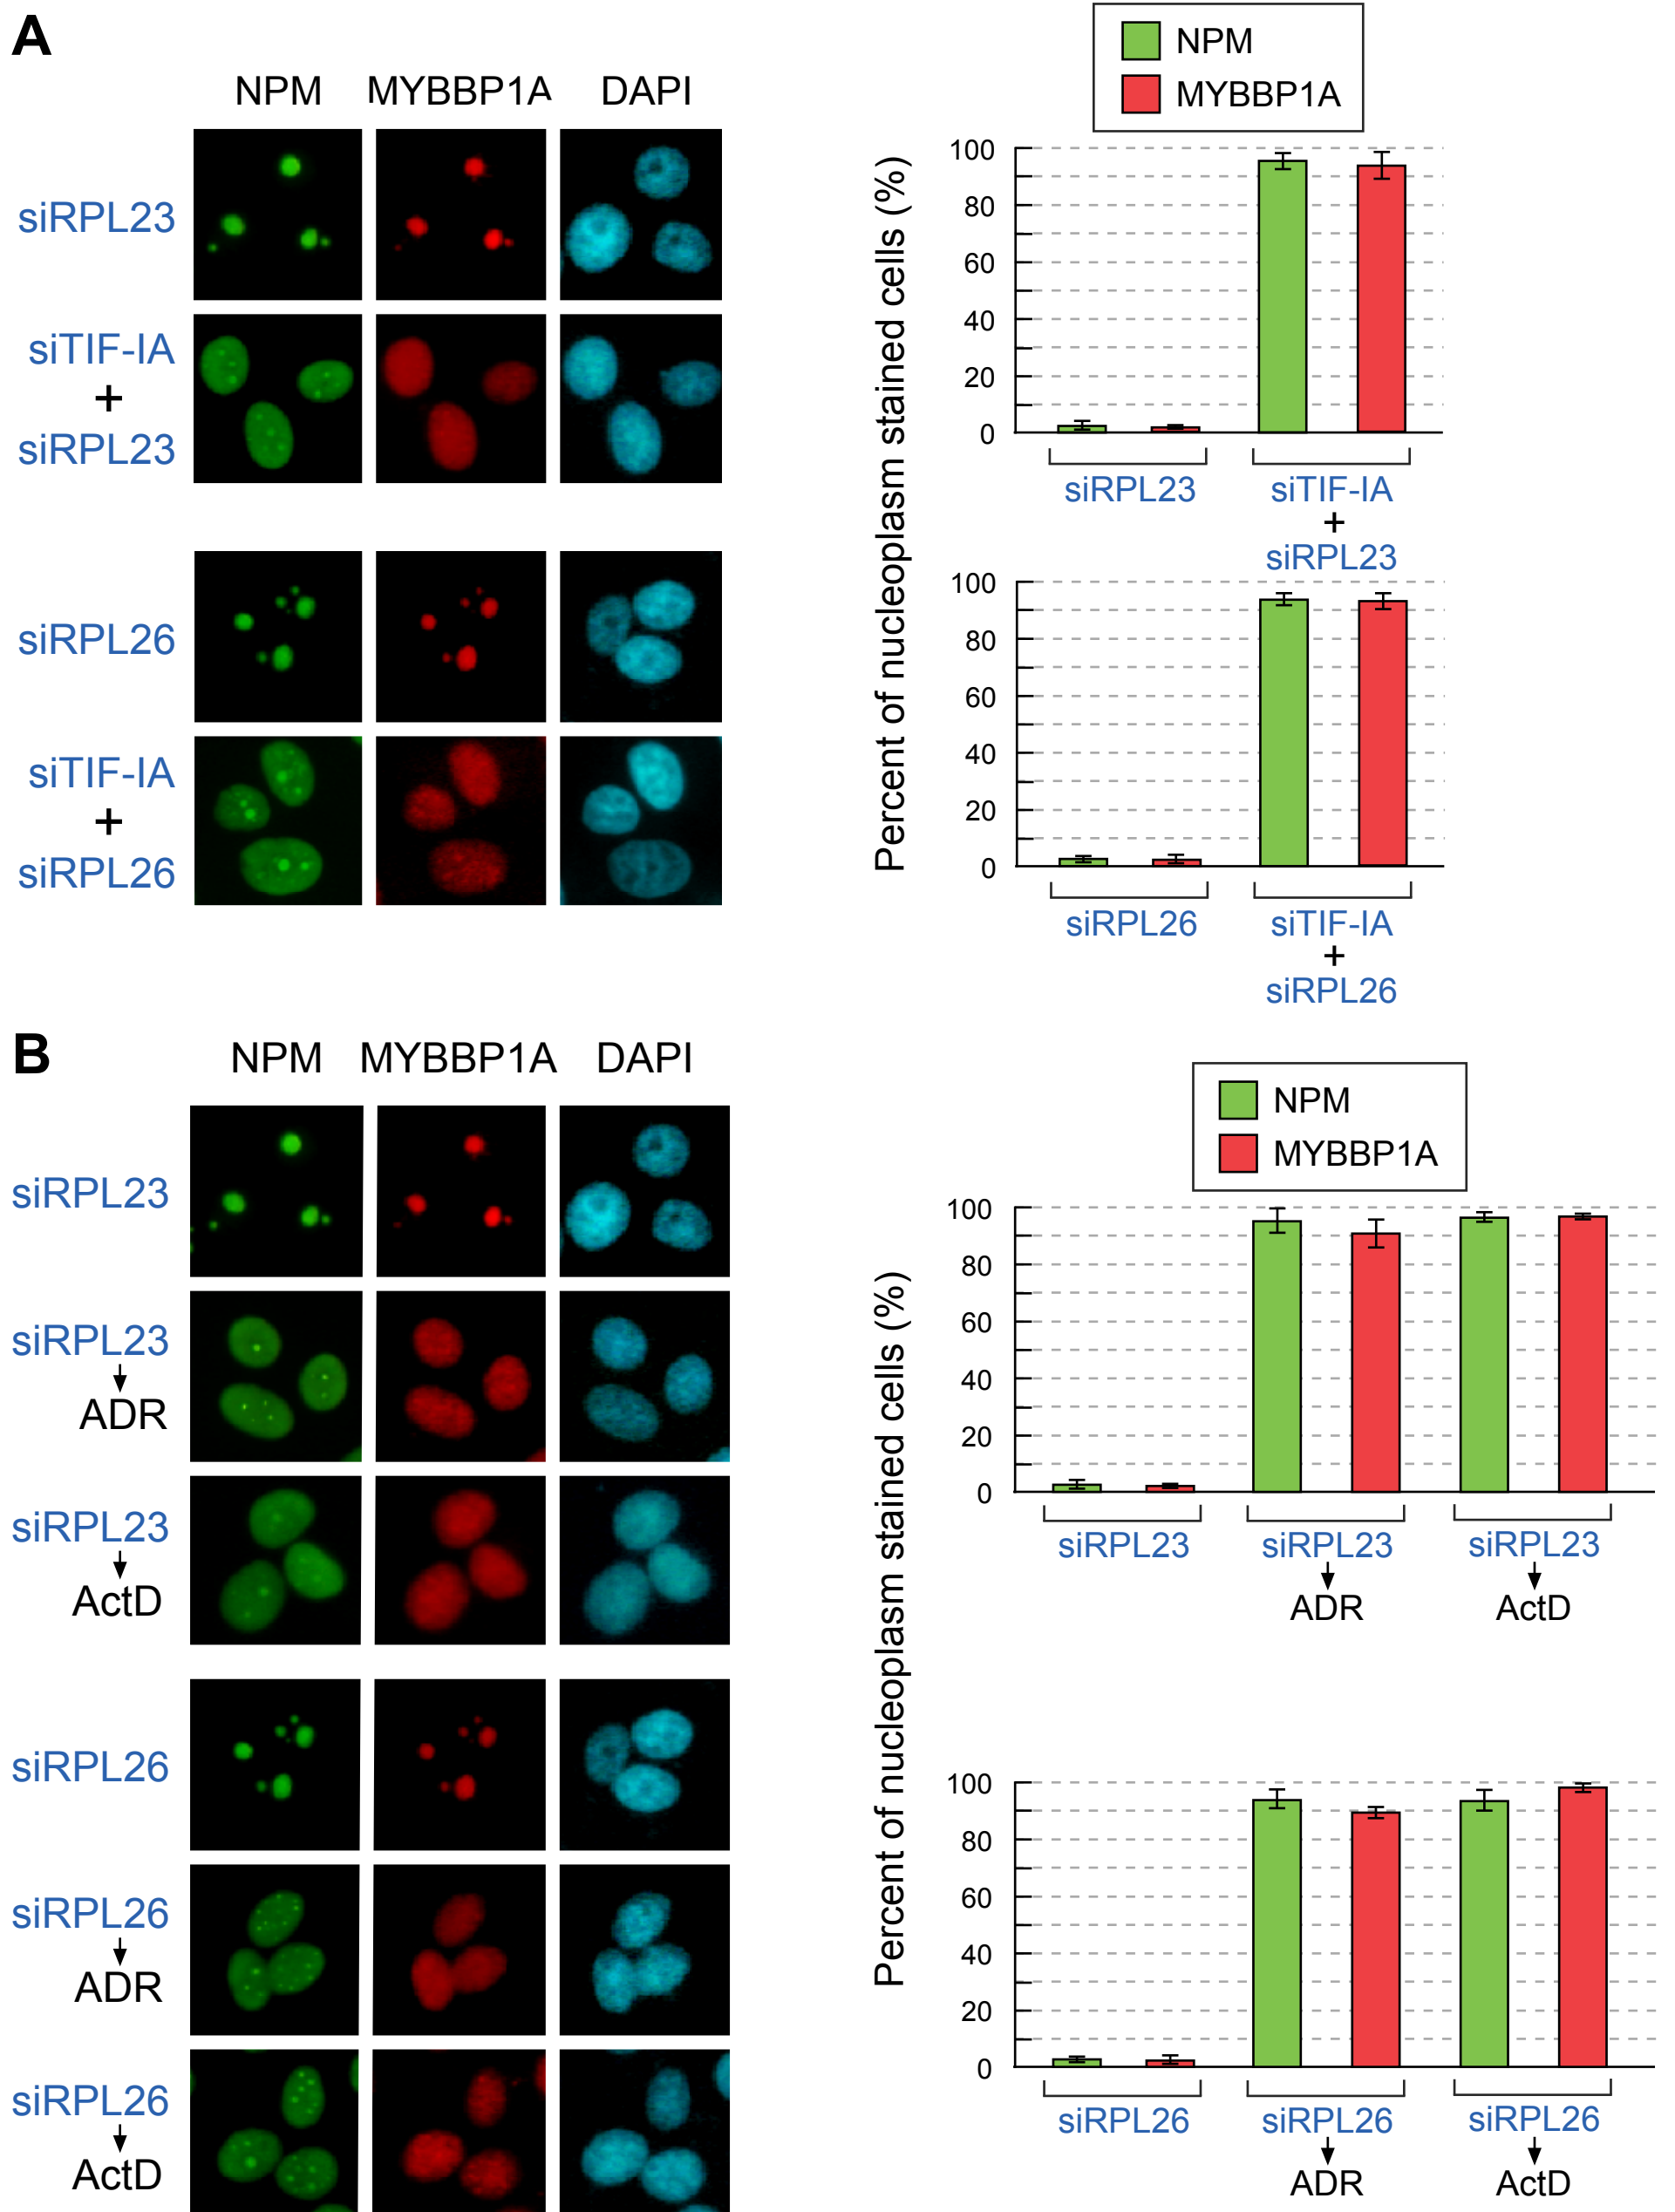

**Supplementary Figure S11** RPL23 and RPL26 are not required for the MYBBP1A translocation induced by nucleolar disruption. **(A)** Left: MCF-7 cells were treated with the indicated siRNAs for 48 hours, and the cells were stained with the indicated antibodies or DAPI. Right: The percentage of cells that showed translocation of NPM or MYBBP1A from the nucleolus after treatment with the indicated siRNAs. Values are given as the means  $\pm$  SD for triplicate experiments. N.D. means "not determined". **(B)** Left: MCF-7 cells were treated with the indicated siRNAs for 48 hours, followed by the treatment with ADR (0.5  $\mu$ g/ml) or ActD (40 nM) for 24 hours. The cells were stained with the indicated antibodies or DAPI. Right: The percentage of cells that showed translocation of NPM or MYBBP1A from the nucleolus after treatment with the indicated siRNAs. Values are given as the mean  $\pm$  SD for triplicate experiments. N.D. means "not determined".

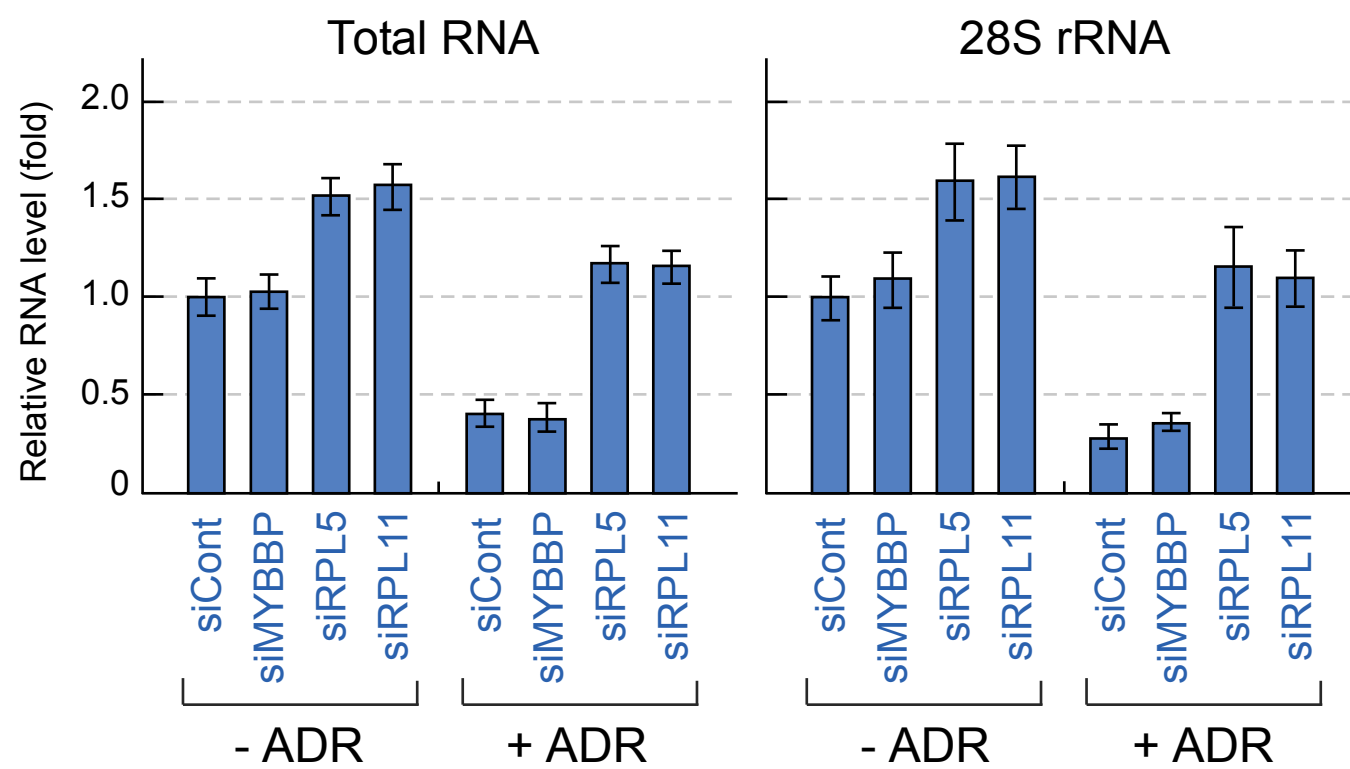

**Supplementary Figure S12** Knockdown of RPL5 or RPL11 retains RNA content in the nucleolus in ADR treated cells. Total RNA was isolated from the isolated nucleoli of MCF-7 cells transfected with the indicated siRNAs for 48 hours and then treated with ADR (0.5  $\mu$ g/ml) for 24 hours. The total RNA (Left) and 28S rRNA (Right) levels were quantified by spectrophotometry and RT-qPCR, respectively.

## Kuroda\_Supplementary Table S1

**Supplementary Table S1** List of the nucleolar proteins that were knocked-down in the screen

| siRNA No. | Name     | Sequence                                                |                    |
|-----------|----------|---------------------------------------------------------|--------------------|
| 1         | DNTTIP2  | GGAAGAACUGCUGGCUGAUUCUGAA<br>UUCAGAAUCAGCCAGCAGUUCUUC   | sense<br>antisense |
| 2         | WDSOF1   | AUAAGAGUCCUCUCGUUGGUCCCGG<br>CCGGGACCAACGAGAGGACUCUUAU  | sense<br>antisense |
| 3         | RPS19BP1 | UACUCUGAGGUGGUCUCGACACUCU<br>AGAGUGUCGAGACCACCUCAGAGUA  | sense<br>antisense |
| 4         | RFC2     | UCCUCACCAGGCUGAUGAAUGUUAU<br>AUAACAUAUCAGCCUGGUGAGGA    | sense<br>antisense |
| 5         | DIMT1L   | CCCGUCCAUGGACAUAGAUGACUU<br>AAGUCAUCUAUGUCCAUGGAACGGG   | sense<br>antisense |
| 6         | EXOSC3   | UCACUAUGCCAAUCACAUGGUCUCC<br>GGAGACCAUGUGAUUGGCAUAGUGA  | sense<br>antisense |
| 7         | CDKN2AIP | AAUAGUGGCAAUUCUACCUCUGAGC<br>GCUCAGAGGUAGAAUUGCCACUAUU  | sense<br>antisense |
| 8         | RFC1     | CCCAUCCCUGGAUUCGGAAUACAAU<br>AUUGUAUUCGAAUCCAGGGAUGGG   | sense<br>antisense |
| 9         | TSPYL1   | GGUGUCUCUUUCUACUCCAAUUAUA<br>UAUAAUUGGAGUAGAAAGAGACACC  | sense<br>antisense |
| 10        | PRKDC    | UAAACACGGUCGUCACCAGUGUCUG<br>CAGACACUGGUGACGACCGUGUUUA  | sense<br>antisense |
| 11        | DDX56    | UAACCGGGUUAUGUAAUAUCAGCUC<br>GAGCUGAUUAUCAUAACCCGGUUA   | sense<br>antisense |
| 12        | EXOSC4   | CCCACGCUCCAGAUUGAUUAUCUAU<br>AUAGAUUAUCAUUCUGGGAGCGUGGG | sense<br>antisense |
| 13        | DIS3     | CAGCAGACAACCAGCUGCAAGUUUAU<br>AUAACUUGCAGCUGGUUGUCUGCUG | sense<br>antisense |
| 14        | C6orf153 | UUGGCUCUGCAAUCCAACAGCUCC<br>GGAGCUGUUGGAAUUGCAGAGCCAA   | sense<br>antisense |
| 15        | SSB      | AUACUCAUCAGUCACUUCAGGUAGG<br>CCUACCUGAAGUGACUGAUGAGUAU  | sense<br>antisense |
| 16        | CCDC59   | GAGCCUUUAUUUGAAGAUCAGUGUA<br>UACACUGAUCUCAAUAAGGCUC     | sense<br>antisense |

|    |          |                                                        |                    |
|----|----------|--------------------------------------------------------|--------------------|
| 17 | REXO4    | CAUAGGUCCAGAGGGCGCCAAGAU<br>UAUCUUGGCCGCCUCUGGACCUAUG  | sense<br>antisense |
| 18 | PINX1    | CCACAGGUAAGAUGUGGAAAGUUA<br>UAACUUUCCACAUCUUUACCUGUGG  | sense<br>antisense |
| 19 | KIF2C    | GGGCAGACAUUUGCCAACUCCA<br>AAUUGGAGUUGGCAAUGUCUGCCC     | sense<br>antisense |
| 20 | PTBP1    | AGAAGGACCGCAAGAUGGCACUGAU<br>AUCAGUGCCAUCUUGCGGUCCUUCU | sense<br>antisense |
| 21 | PARP1    | AGAAGCUGCAGCUUGUAGUAGGAGU<br>ACUCCUACUACAAGCUGCAGCUUCU | sense<br>antisense |
| 22 | XRCC1    | UUAUCUCGCAGCUCGGAGCGGAAGG<br>CCUCCGCUCCGAGCUGCGAGAUAA  | sense<br>antisense |
| 23 | EMG1     | UUGAGUAGCUCAUAUGUCUUCCCUA<br>UAGGGAAGACAUUAGAGCUACUCAA | sense<br>antisense |
| 24 | ABT1     | UUUACGGGCCUCAGUUCUGUCUCA<br>UGAGCAGGAACUGAGGGCCCGUAAA  | sense<br>antisense |
| 25 | SMC4     | CAAGGACAUUCAGAGUUGUACAGUA<br>UACUGUACAACUCUGAAUGUCCUUG | sense<br>antisense |
| 26 | SKIV2L2  | GGGAAUUAACAUGCCAGCUAGAACU<br>AGUUCUAGCUGGCAUGUAAUUC    | sense<br>antisense |
| 27 | PNO1     | AAGAUUAGGUUGCAAUUGGCAGUUC<br>GAACUGCCAUUUGCAACCUAAUCUU | sense<br>antisense |
| 28 | C14orf21 | UGUUCGUGGACAAAGCUAGGGCCUG<br>CAGGCCCUAGCUUUGUCCACGAACA | sense<br>antisense |
| 29 | NCL      | UUCUGUUGCACUGUAGGAGAGGUUG<br>CAACCUCUCCUACAGUGCAACAGAA | sense<br>antisense |
| 30 | PRPF19   | UUUCAGGGUAGCCAGAGCUUCUCGG<br>CCGAGAAGCUCUGGCUACCCUGAAA | sense<br>antisense |
| 31 | XRCC5    | UUGGAAACAAGUCUUAAGGGUGUC<br>GACACCCUUGAAGACUUGUUUCCAA  | sense<br>antisense |
| 32 | CDC2L5   | GCCUCCCAUGCUGCCUGAAGAUAAA<br>UUUAUCUUCAGGCAGCAUGGGAGGC | sense<br>antisense |
| 33 | FCF1     | CAAGGAUCCAAGAUUUGAACGAUUA<br>UAAUCGUUCAAAUCUUGGAUCCUUG | sense<br>antisense |
| 34 | BYSL     | CAUUGUGGCAGCCUUCUCCAGGGUG<br>CACCCUGGAGAAGGCUGCCACAAUG | sense<br>antisense |

|    |          |                                                          |                    |
|----|----------|----------------------------------------------------------|--------------------|
| 35 | BLM      | AACAGAAGGAAACUUCUGGCGAAGC<br>GCUUCGCCAGAAGUUUCCUUCUGUU   | sense<br>antisense |
| 36 | UTP18    | GCUCAUAAAUGGCAUUGCUGGAUUAU<br>AUAUCCAGCAAUGCCAUUUAUGAGC  | sense<br>antisense |
| 37 | ADAR     | CAGAGAGGUGUUGAUUGCCUUUCCU<br>AGGAAAGGCAAUCAACACCUCUCUG   | sense<br>antisense |
| 38 | POP1     | UGAAGUUC CAGGAUGAGGCUCUUGU<br>ACAAGAGCCUCAUCCUGGAACUUCA  | sense<br>antisense |
| 39 | RCL1     | CAACAAGUUCAUACCUGAUUAUCUAU<br>AUAGAUUAUCAGGUAUGAACUUGUUG | sense<br>antisense |
| 40 | CD3EAP   | UAGAGGCUCAGUGUUAUUCUGUUC<br>GGAACAGAUUAACACUGAGCCUCUA    | sense<br>antisense |
| 41 | NCAPD3   | CGGAGUCAAGGAAAUGACAUCUUAU<br>AUAAGAUGUCAUUUCCUUGACUCCG   | sense<br>antisense |
| 42 | WDR3     | GGGACAUAGCUUAUCUGCAAGAGAU<br>AUCUCUUGCAGAUAAAGCUAUGUCCC  | sense<br>antisense |
| 43 | RFC5     | CCAACAUCCUGGACUGGAUGUUGAA<br>UUCAACAUCCAGUCCAGGAUGUUGG   | sense<br>antisense |
| 44 | RBM39    | CAAGAGCCCUGUGAGAGAACCUAUU<br>AAUAGGUUCUCUCACAGGGCUCUUG   | sense<br>antisense |
| 45 | AURKB    | CCCGACAUCUUAACGCGGCACUUCA<br>UGAAGUGCCGCGUUAAGAUGUCGGG   | sense<br>antisense |
| 46 | PAI-RBP1 | UAAACACACUGAUUUAGGAGUGCGU<br>ACGCACUCCUAAAUCAGUGUGUUUA   | sense<br>antisense |
| 47 | SMC2     | AUUAGAAGCCCGAACCCUGAGACAGG<br>CCUGUCUCAGGUUCGGGCUUCUAAU  | sense<br>antisense |
| 48 | MKI67IP  | UUUAAAUCGCUCCUCCAUCCGUAGC<br>GCUACGGAUGGAGGAGCGAUUUAAA   | sense<br>antisense |
| 49 | ISG20L2  | UUUAUAGCUCCAUGGUGGCCUGGG<br>CCCAGGCCACCAUGGAGCUAUUAAA    | sense<br>antisense |
| 50 | TBL3     | UCAGCUGAUGGCACCAUCAAGCUCU<br>AGAGCUUGAUGGUGCCAUCAGCUGA   | sense<br>antisense |
| 51 | ILF3     | CCACUGAUGCUAUUGGGCAUCUAGA<br>UCUAGAUGCCCAAUAGCAUCAGUGG   | sense<br>antisense |
| 52 | ESF1     | UUUGCAACCCGUCUAAACCGCUGGU<br>ACCAGCGGUUUAGACGGGUUGCAAA   | sense<br>antisense |

|    |          |                                                         |                    |
|----|----------|---------------------------------------------------------|--------------------|
| 53 | TOP1     | GGGAAGGACUCCAUCAGAUACUAUA<br>UAUAGUAUCUGAUGGAGUCCUUC    | sense<br>antisense |
| 54 | BMS1     | CAGUGCAGAGGAAGAAGACUCAGAA<br>UUCUGAGUCUUCUCCUCUGCACUG   | sense<br>antisense |
| 55 | SRP14    | UUCAAGGUGAUUAUAGACGCUGCCCG<br>CGGGCAGCGUCUAUAUCACCUUGAA | sense<br>antisense |
| 56 | FBXL11   | GAACCCGAAGAAGAAAGGAUUCGUU<br>AACGAAUCCUUCUUCUUCGGGUUC   | sense<br>antisense |
| 57 | GPATCH4  | AUAACGGGUGGUCUCCUAGAAAGG<br>CCUUUCUAAGGAGACCACCCGUUAU   | sense<br>antisense |
| 58 | HIST1H1C | UUUCGUUUGCACCAGAGUGCCCUUG<br>CAAGGGCACUCUGGUGCAAACGAAA  | sense<br>antisense |
| 59 | SEN3     | CCCUCAGCACUGAUGAGGUAGUAGA<br>UCUACUACCUCUACAGUGCUGAGGG  | sense<br>antisense |
| 60 | H2AFZ    | UGGGCCGUUUCAUCGACACCUAAA<br>UUUAGGUGUCGAUGAAUACGGCCCA   | sense<br>antisense |
| 61 | RSL1D1   | UUAUCCAGCUGCUUCCGUGCUGUCG<br>CGACAGCACGGAAGCAGCUGGAUAA  | sense<br>antisense |
| 62 | ZCCHC9   | UUAUAUGUGGUACUAACUCGGGCC<br>GGGCCCGAGUUAGUACCACAUUAA    | sense<br>antisense |
| 63 | VRK1     | AAGAGGUCCAUUGUCACUGGGUUC<br>GGAACCCAGUGACAAUGGACCUCUU   | sense<br>antisense |
| 64 | CDK7     | CCAAACUGUCCAGUGGAAACCUUAA<br>UUAAGGUUCCACUGGACAGUUUGG   | sense<br>antisense |
| 65 | WDR36    | CCGGACUGACAUUUCUCCAUAAGAGA<br>UCUCUAUGGAGAAAUGUCAGUCCGG | sense<br>antisense |
| 66 | CDK9     | CAGAUGCUGCUUAACGGCCUCUACU<br>AGUAGAGGCCGUUAAGCAGCAUCUG  | sense<br>antisense |
| 67 | NOC4L    | UGUCGUCGUAGUCCAGGUACUCCCG<br>CGGGAGUACCUGGACUACGACGACA  | sense<br>antisense |
| 68 | MYBBP1A  | UUCACCAGCCGACCUGACUGAAAGA<br>UCUUUCAGUCAGGUCGGCUGGUGAA  | sense<br>antisense |
| 69 | WDR18    | UGGACCUGGCUGAGCACCAUAUGUU<br>AACAUUAGGUGCUCAGCCAGGUCCA  | sense<br>antisense |
| 70 | WDR75    | UUGCAAGCCAGUUACCAAGCAGCC<br>GGCUGCUUUGGUAACUGGCUUGCAA   | sense<br>antisense |

|    |          |                                                         |                    |
|----|----------|---------------------------------------------------------|--------------------|
| 71 | TOP2A    | GCUCAGCUCUUUGGCUCGAUUGUUA<br>UAACAAUCGAGCCAAAGAGCUGAGC  | sense<br>antisense |
| 72 | CIRH1A   | CAGGAAUCCGCUGUGUGGCUUACAA<br>UUGUAAGCCACACAGCGGAUCCUG   | sense<br>antisense |
| 73 | NOL14    | AUCAAUGACUGUGAGGUCUGGUGGG<br>CCCACCAGACCUCACAGUCAUUGAU  | sense<br>antisense |
| 74 | C1orf107 | UUAGGGUGUUGAGUAGCUGGCUCUG<br>CAGAGCCAGCUACUCAACACCCUAA  | sense<br>antisense |
| 75 | TWISTNB  | CCUUAACAGGAAACGCACCGGCAUU<br>AAUGCCGGUGCGUUUCCUGUUAAGG  | sense<br>antisense |
| 76 | KRR1     | UUCUGAUUCAUCUUGGUUCUCCGGC<br>GCCGGAGAACCAAGAUGAAUCAGAA  | sense<br>antisense |
| 77 | TEX10    | UUCAGUAGAUGACAGGCCUUCAUCC<br>GGAUGAAGGCCUGUCAUCUACUGAA  | sense<br>antisense |
| 78 | TTF1     | GGAUGACUAAUGGUCGGCGUAUCUA<br>UAGAUACGCCGACCAUAGUCAUCC   | sense<br>antisense |
| 79 | BOP1     | UGUAGAUGC GCCUGCCAUCCAGGUC<br>GACCUGGAUGGCAGGCGCAUCUACA | sense<br>antisense |
| 80 | POLR1A   | CCAUCUCUCCCUGGUUGCUGAUUUAU<br>AUAAUCAGCAACCAGGGAGAGAUGG | sense<br>antisense |
| 81 | MINA     | CGGCUCCUGUAAGCAGAUGAAGUU<br>AACUUCAUCUGCUUACAGGGAGCCG   | sense<br>antisense |
| 82 | NPM3     | UUACACUCGUCUUUGGCUCCUCGG<br>CCGAGGGAGCCAAAGACGAGUGUAA   | sense<br>antisense |
| 83 | TINP1    | CAGAGAGGGACAAUCUCGAGCUAAA<br>UUUAGCUCGAGAUUGUCCUCUCUG   | sense<br>antisense |
| 84 | FRG1     | UAGACUUCACGUAGGAGUACUCGGC<br>GCCGAGUACUCCUACGUGAAGUCUA  | sense<br>antisense |
| 85 | PELP1    | CCUCAAUUCCUGGAGCAUCGGUAGA<br>UCUACCGAUGCUC CAGGAAUUGAGG | sense<br>antisense |
| 86 | ZFP106   | GGUGGCAUGGUUGCUCUCUGAUUUU<br>AAUAUCAGAGAGCAACCAUGCCACC  | sense<br>antisense |
| 87 | PWP1     | CAGUGCAAUUUAGAGGUGCAUGUUU<br>AAACAUGCACCUCUAAAUUGCACUG  | sense<br>antisense |
| 88 | PPAN     | AACUGUGGAACAUCACUUUGCCCUC<br>GAGGGCAAAGUGAUGUCCACAGUU   | sense<br>antisense |

|     |           |                                                          |                    |
|-----|-----------|----------------------------------------------------------|--------------------|
| 89  | LAS1L     | CCUACAUCCUCAGAUGGACCGUUGA<br>UCAACGGUCCAUCUGAGGAUGUAGG   | sense<br>antisense |
| 90  | SRFBP1    | GAGCAAUUGCCAGACUAGCAGUACA<br>UGUACUGCUAGUCUGGCAAUUGCUC   | sense<br>antisense |
| 91  | NAT10     | GCGGUGGCAUUUUGGGUACUCCAAUA<br>UAUUGGAGUACCCAAAUGCCACCGC  | sense<br>antisense |
| 92  | DUSP11    | UACAGUGGACACCAAUAAGUUUAUC<br>GAUAAACUUAUUGGUGUCCACUGUA   | sense<br>antisense |
| 93  | EBNA1BP2  | CCCUACGAAGCGACCCACUGAUUAU<br>AUAUACAGUGGGUCGCUUCGUAGGG   | sense<br>antisense |
| 94  | RPL26     | AAUCCCUUUGUGACUUCGACCGAA<br>UUCGGUCGGAAGUCACAAAGGGAUU    | sense<br>antisense |
| 95  | GNL3      | ACAACUUGCAUGCUCUCCUUGUAAGCC<br>GGCUUACAAGGAGCAUGCAAGUUGU | sense<br>antisense |
| 96  | PES1      | CCAUUGUCAACAAGUUCGUGAAUA<br>UAUUCACGGAACUUGUUGACAAUGG    | sense<br>antisense |
| 97  | NOM1      | GGAUCAGCAGGAGAGAGAAAUCAUU<br>AAUGAUUUCUCUCUCCUGCUGAUCC   | sense<br>antisense |
| 98  | NOL1      | GGUCAAGACUGGACUAGUGGUGUA<br>UACACCACUAGUCCAGUCUUUGACC    | sense<br>antisense |
| 99  | C14orf169 | CAUGGAACUGUUGCUUGGUUCUUAU<br>AUAAGAACCAAGCAACAGUCCAUG    | sense<br>antisense |
| 100 | RRP1B     | CAGGAGGUUUCAGUCAGGAAGAACU<br>AGUUCUUCUGACUGAAACCUCCUG    | sense<br>antisense |
| 101 | RPL5      | UUCACUUGGUAUCUCUUAAGUAGG<br>CCUACUUUAAGAGAUACCAAGUGAA    | sense<br>antisense |
| 102 | RPL11     | GCUAGAUACACUGUCAGAUCUUCUUG<br>CAAAGGAUCUGACAGUGUAUCUAGC  | sense<br>antisense |
| 103 | RPL23     | CAGCAGUGGUCAUUCGACAACGAAA<br>UUUCGUUGUCGAAUGACCACUGCUG   | sense<br>antisense |
| 104 | NPM1      | UAGUAGCGGUGGUCAGACAUGGAAA<br>UUUCCAUGUCUGACCACCGCUACUA   | sense<br>antisense |
| 105 | NCL       | UUCUGUUGCACUGUAGGAGAGGUUG<br>CAACCUCUCCUACAGUGCAACAGAA   | sense<br>antisense |
| 106 | NS        | ACAACUUGCAUGCUCUCCUUGUAAGCC<br>GGCUUACAAGGAGCAUGCAAGUUGU | sense<br>antisense |



|     |     |                                                        |                    |
|-----|-----|--------------------------------------------------------|--------------------|
| 107 | ARF | GAAAGAACCAGAGAGGCUCUGAGAA<br>UUCUCAGAGCCUCUCUGGUUCUUUC | sense<br>antisense |
|-----|-----|--------------------------------------------------------|--------------------|
